# Supplementary material for: Assemblies of salts of urea and thiourea derivatives and release of hosts from composites with calcium oxide
Source: Royal Society of Chemistry journal article supplement (doi:10.1039/d2nj05412d), 2023-01-01
Supplement: d2nj05412d2.pdf [file d2nj05412d2.pdf]

## Supporting information

### Assemblies of Salts of Urea and Thiourea Derivatives and Release of Host from Composites with Calcium oxide

Rinki Brahma and Jubaraj Bikash Baruah\*

#### Figure and Table captions

- Table 1Sa. Crystallographic parameters of the urea/thiourea derivatives and their salts
- Table 1Sb. Crystallographic parameters of the urea/thiourea derivatives and their salts
- Table S2. Hydrogen-bond parameters in the urea/thiourea derivatives and corresponding perchlorate and nitrate salts.
- Figure S1. IR-spectra of the solid samples of (a) (i) *phenurea.H<sub>2</sub>O*, (ii) *Hphenurea.ClO<sub>4</sub>*, (b) (i) *naphurea.H<sub>2</sub>O*, (ii) *Hnaphurea.ClO<sub>4</sub>.H<sub>2</sub>O*, (iii) *Hnaphurea.NO<sub>3</sub>*; (c) (i) *naphthiourea*, (ii) *Hnaphthiourea ClO<sub>4</sub>*.
- Figure S2. ESI mass of the (a) *phenurea*, (b) *phenthiourea*, (c) *naphurea* and (d) *naphthiourea*.
- Figure S3. UV-vis spectra of solid samples of (a) *phenurea.H<sub>2</sub>O* ( $\lambda_{\text{max}} = 291$  nm), *Hphenurea.ClO<sub>4</sub>* ( $\lambda_{\text{max}} = 309$  nm), (b) (i) *phenthiourea* ( $\lambda_{\text{max}} = 295$  nm), (ii) *Hphenthiourea.ClO<sub>4</sub>* ( $\lambda_{\text{max}} = 307$  nm), (iii) *Hphenthiourea.NO<sub>3</sub>* ( $\lambda_{\text{max}} = 307$  nm), (c) (i) *naphthiourea* ( $\lambda_{\text{max}} = 306$  nm), (ii) *Hnaphthiourea.ClO<sub>4</sub>* ( $\lambda_{\text{max}} = 312$  nm, 353 nm).
- Figure S4. Powder X-ray diffraction patterns of (a) *Hphenurea.ClO<sub>4</sub>*, (b) *phenthiourea*, (c) *Hphenthiourea.ClO<sub>4</sub>*, (d) *Hphenthiourea.NO<sub>3</sub>*, (e) *naphurea.H<sub>2</sub>O*, (f) *Hnaphurea.ClO<sub>4</sub>.H<sub>2</sub>O*, (g) *Hnaphurea.NO<sub>3</sub>*, (h) *naphthiourea*, (i) *naphthiourea.ClO<sub>4</sub>*.
- Figure S5. Thermogram of (a) *naphurea.H<sub>2</sub>O*, (b) *Hnaphurea.ClO<sub>4</sub>.H<sub>2</sub>O* (heating rate 10°C/min).
- Figure S6. Solid-state photoluminescence spectra of (a) (i) *phenurea.H<sub>2</sub>O* ( $\lambda_{\text{ex}} = 330$  nm,  $\lambda_{\text{em}} = 473$  nm, 492 nm, 530 nm), (ii) *Hphenurea.ClO<sub>4</sub>* ( $\lambda_{\text{ex}} = 309$  nm,  $\lambda_{\text{em}} = 440$  nm); (b) (i) *phenthiourea* ( $\lambda_{\text{ex}} = 295$  nm,  $\lambda_{\text{em}} = 530$  nm), (ii) *Hphenthiourea.ClO<sub>4</sub>* ( $\lambda_{\text{ex}} = 307$  nm,  $\lambda_{\text{em}} = 468$  nm), (iii) *Hphenthiourea.NO<sub>3</sub>* ( $\lambda_{\text{ex}} = 307$  nm,  $\lambda_{\text{em}} = 468$  nm); (c) (i) *naphththiourea* ( $\lambda_{\text{ex}} = 306$  nm,  $\lambda_{\text{em}} = 468$  nm), (ii) *Hnaphththiourea.ClO<sub>4</sub>* ( $\lambda_{\text{ex}} = 321$  nm,  $\lambda_{\text{em}} = 468$  nm).
- Figure S7. Solid-state photoluminescence spectra of *Hnaphurea.NO<sub>3</sub>* (i)  $\lambda_{\text{ex}} = 321$  nm,  $\lambda_{\text{em}} = 391$  nm, 492 nm and (ii)  $\lambda_{\text{ex}} = 335$  nm,  $\lambda_{\text{em}} = 386$  nm, 509 nm.
- Figure S8. (a) Arrangements of the naphthalene rings and (b) the C-H $\cdots\pi$  interactions in *naphurea.H<sub>2</sub>O*.
- Figure S9. Free perchlorate anion and the urea tapes showing the projections of the carbonyls in the *Hnaphurea.ClO<sub>4</sub>.H<sub>2</sub>O*.
- Figure S10. Hydrogen bond environment of nitrate ion in the *Hnaphurea.NO<sub>3</sub>*.
- Figure S11. C-H $\cdots\pi$  interaction in the self-assembly of *Hnaphthiourea*.
- Figure S12. Electronic energy levels calculated by DFT showing the HOMO-LUMO gap in (a) *phenthiourea*, (b) *Hphenthiourea cation*, (c) *phenurea.H<sub>2</sub>O*, (d) *Hphenurea cation*, (e)

*naphthiourea*, (f) *Hnaphthiourea cation*, (g) *naphurea.H<sub>2</sub>O*, (h) *Hnaphurea cation*.

- Figure S13. The changes in emission spectra of *Hnaphurea.NO<sub>3</sub>* in water upon addition of water (10  $\mu$ L aliquots) ( $\lambda_{\text{ex}} = 258$  nm).
- Figure S14. Changes in the emission spectra of supernatant water upon release of *naphurea* from *Hnaphurea.NO<sub>3</sub>@CaO* pellet in water ( $\lambda_{\text{ex}} = 258$  nm)
- Figure S15. Fluorescence spectroscopic titration ( $\lambda_{\text{ex}} = 258$  nm) of *Hnaphurea.ClO<sub>4</sub>.H<sub>2</sub>O* (10  $\mu$ M) in water upon addition of NaAsO<sub>2</sub> (As in +3 oxidation state) (10  $\mu$ M in 10  $\mu$ L aliquots) showing enhancement of emission
- Figure S16. Fluorescence spectroscopic titration ( $\lambda_{\text{ex}} = 258$  nm) of *Hnaphurea.ClO<sub>4</sub>.H<sub>2</sub>O* (10  $\mu$ M) in water upon addition of NaHASO<sub>4</sub>.7H<sub>2</sub>O (As in +5 oxidation state) (10  $\mu$ M in 10  $\mu$ L aliquots) showing enhancement of emission.
- Figure S17. Fluorescence spectroscopic titration ( $\lambda_{\text{ex}} = 258$  nm) of *Hnaphurea.ClO<sub>4</sub>.H<sub>2</sub>O* (10  $\mu$ M) in water upon addition of NaOH (10  $\mu$ M in 10  $\mu$ L aliquots) showing enhancement of emission.
- Figure S18. Photograph of solid samples of (a) *naphurea.H<sub>2</sub>O*, (b) *Hnaphurea.ClO<sub>4</sub>.H<sub>2</sub>O*, (c) *Hnaphurea.NO<sub>3</sub>* under UV lamp at 365 nm.
- Figure S19. Photograph of solid samples of (a) *naphurea.H<sub>2</sub>O*, (b) *Hnaphurea.ClO<sub>4</sub>.H<sub>2</sub>O*, (c) *Hnaphurea.ClO<sub>4</sub>.H<sub>2</sub>O@CaO* pellet under UV-lamp at 365 nm.
- Figure S20. Photograph of solid samples of (a) *naphurea.H<sub>2</sub>O*, (b) *Hnaphurea.NO<sub>3</sub>*, (c) *Hnaphurea.NO<sub>3</sub>@CaO* pellet under UV-lamp at 365 nm.
- Figure S21. Powder X-ray diffraction patterns of (a) (i) CaO, (ii) *Hnaphurea.ClO<sub>4</sub>.H<sub>2</sub>O*, (iii) CaO@*Hnaphurea.ClO<sub>4</sub>.H<sub>2</sub>O*; (b) (i) CaO, (ii) *Hnaphurea.NO<sub>3</sub>*, (iii) CaO@*Hnaphurea.NO<sub>3</sub>*.
- Figure S22. Changes in the fluorescence emission during the release of *naphurea* from *Hnaphurea@CaO* pellet in water ( $\lambda_{\text{ex}} = 258$  nm).
- Figure S23. <sup>1</sup>H-NMR (600 MHz, DMSO-d<sub>6</sub>) spectrum of *phenurea.H<sub>2</sub>O*.
- Figure S24. <sup>1</sup>H-NMR (500 MHz, DMSO-d<sub>6</sub>) spectrum of *phenthiourea*.
- Figure S25. <sup>1</sup>H-NMR (500 MHz, DMSO-d<sub>6</sub>) spectrum of *naphurea.H<sub>2</sub>O*.
- Figure S26. <sup>1</sup>H-NMR (500 MHz, DMSO-d<sub>6</sub>) spectrum of *naphthiourea*.
- Figure S27. <sup>1</sup>H-NMR (500 MHz, DMSO-d<sub>6</sub>) spectrum of *Hphenurea.ClO<sub>4</sub>*.
- Figure S28. <sup>1</sup>H-NMR (500 MHz, DMSO-d<sub>6</sub>) spectrum of *Hphenthiourea.ClO<sub>4</sub>*.
- Figure S29. <sup>1</sup>H-NMR (500 MHz, DMSO-d<sub>6</sub>) spectrum of *Hphenthiourea.NO<sub>3</sub>*
- Figure S30. <sup>1</sup>H-NMR (500 MHz, DMSO-d<sub>6</sub>) spectrum of *Hnaphurea.ClO<sub>4</sub>.H<sub>2</sub>O*.
- Figure S31. <sup>1</sup>H-NMR (500 MHz, DMSO-d<sub>6</sub>) spectrum of *Hnaphurea.NO<sub>3</sub>*.
- Figure S32. <sup>1</sup>H-NMR (500 MHz, DMSO-d<sub>6</sub>) spectrum of *Hnaphthiourea.ClO<sub>4</sub>*.
- Figure S33. Intensity versus time curve of different ratios of *Hnaphurea.NO<sub>3</sub>@CaO* pellets in water ( $\lambda_{\text{ex}} = 258$  nm,  $\lambda_{\text{em}} = 385$  nm)
- Figure S34. Intensity versus time curve of different ratios of *Hnaphurea@CaO* pellets in water ( $\lambda_{\text{ex}} = 258$  nm,  $\lambda_{\text{em}} = 385$  nm).
- Figure S35. Electronic energy levels calculated by DFT showing the HOMO-LUMO gap in *Hphenthiourea.ClO<sub>4</sub>* with space groups C2/c and I2/a and total energy difference between

these two forms (calculated by Gaussian software using the B3LYP functional and the 6-31G basis set).

Table S3. X, Y, Z coordinates of *Hphenthiourea.ClO<sub>4</sub>* (space group - C2/c).

Table S4. X, Y, Z coordinates of *Hphenthiourea.ClO<sub>4</sub>* (space group - I2/a).

Table 1Sa. Crystallographic parameters of the urea/thiourea derivatives and their salts

| Parameters                    | <i>Hphenurea.ClO<sub>4</sub></i>                                | <i>phenthiourea</i>                              | <i>Hphenthiourea.ClO<sub>4</sub></i>                              | <i>Hphenthiourea.NO<sub>3</sub></i>                             |
|-------------------------------|-----------------------------------------------------------------|--------------------------------------------------|-------------------------------------------------------------------|-----------------------------------------------------------------|
| Formula                       | C <sub>13</sub> H <sub>14</sub> ClN <sub>3</sub> O <sub>5</sub> | C <sub>13</sub> H <sub>13</sub> N <sub>3</sub> S | C <sub>13</sub> H <sub>14</sub> ClN <sub>3</sub> O <sub>4</sub> S | C <sub>13</sub> H <sub>14</sub> N <sub>4</sub> O <sub>3</sub> S |
| CCDC                          | 2171843                                                         | 2171848                                          | 2172477                                                           | 2171845                                                         |
| Mol.wt.                       | 327.72                                                          | 243.334                                          | 343.78                                                            | 306.34                                                          |
| Space group                   | Pbca                                                            | P2 <sub>1</sub> /c                               | I2/a                                                              | P2 <sub>1</sub> /c                                              |
| a(Å)                          | 10.6033(11)                                                     | 5.9160(4)                                        | 18.620(3)                                                         | 11.5055(9)                                                      |
| b(Å)                          | 9.1856(9)                                                       | 22.1005(16)                                      | 5.4988(8)                                                         | 8.4091(7)                                                       |
| c (Å)                         | 30.910(3)                                                       | 9.9693(5)                                        | 30.636(4)                                                         | 14.4045(13)                                                     |
| α (°)                         | 90                                                              | 90                                               | 90                                                                | 90                                                              |
| β (°)                         | 90                                                              | 100.216(6)                                       | 96.337(8)                                                         | 92.059(3)                                                       |
| γ (°)                         | 90                                                              | 90                                               | 90                                                                | 90                                                              |
| V (Å <sup>3</sup> )           | 3010.5(5)                                                       | 1282.79(14)                                      | 3117.6(8)                                                         | 1392.7(2)                                                       |
| Density, g cm <sup>-3</sup>   | 1.446                                                           | 1.260                                            | 1.465                                                             | 1.461                                                           |
| Abs. coeff., mm <sup>-1</sup> | 0.281                                                           | 0.233                                            | 0.400                                                             | 0.249                                                           |
| F (000)                       | 1360                                                            | 512.756                                          | 1424                                                              | 640                                                             |
| Total no. of reflections      | 2666                                                            | 2256                                             | 2750                                                              | 2460                                                            |
| Reflections, I > 2σ(I)        | 1762                                                            | 1630                                             | 2062                                                              | 1890                                                            |
| Max. θ/°                      | 25.047                                                          | 25.04                                            | 24.998                                                            | 25.046                                                          |
| Ranges (h, k, l)              | -11 ≤ h ≤ 12                                                    | -7 ≤ h ≤ 7                                       | -22 ≤ h ≤ 22                                                      | -13 ≤ h ≤ 13                                                    |
|                               | 10 ≤ k ≤ 10                                                     | -29 ≤ k ≤ 27                                     | -6 ≤ k ≤ 6                                                        | -10 ≤ k ≤ 10                                                    |
|                               | -36 ≤ l ≤ 36                                                    | -6 ≤ l ≤ 12                                      | -36 ≤ l ≤ 36                                                      | -17 ≤ l ≤ 17                                                    |
| Complete to 2θ (%)            | 99.7                                                            | 99.9                                             | 99.9                                                              | 99.8                                                            |
| Data/restraints/parameters    | 2666/6/ 220                                                     | 2256/0/162                                       | 2750/ 0/ 199                                                      | 2460/1/190                                                      |
| GooF (F <sup>2</sup> )        | 1.046                                                           | 1.0614                                           | 1.038                                                             | 1.031                                                           |
| R indices [I > 2σ(I)]         | 0.0650                                                          | 0.0410                                           | 0.0810                                                            | 0.0443                                                          |
| wR <sub>2</sub> [I > 2σ(I)]   | 0.1792                                                          | 0.0834                                           | 0.1397                                                            | 0.1023                                                          |
| R indices (all data)          | 0.0997                                                          | 0.0645                                           | 0.1098                                                            | 0.0610                                                          |
| wR <sub>2</sub> (all data)    | 0.2044                                                          | 0.0949                                           | 0.1649                                                            | 0.1121                                                          |

Table 1Sb. Crystallographic parameters of the urea/thiourea derivatives and their salts

| Parameters                           | <i>naphurea.H<sub>2</sub>O</i>                                | <i>Hnaphurea.ClO<sub>4</sub>.H<sub>2</sub>O</i>                 | <i>Hnaphurea.NO<sub>3</sub></i>                               | <i>Naphthiourea</i>                              | <i>Hnaphthiourea.ClO<sub>4</sub></i>                              |
|--------------------------------------|---------------------------------------------------------------|-----------------------------------------------------------------|---------------------------------------------------------------|--------------------------------------------------|-------------------------------------------------------------------|
| Formula                              | C <sub>17</sub> H <sub>17</sub> N <sub>3</sub> O <sub>2</sub> | C <sub>17</sub> H <sub>18</sub> ClN <sub>3</sub> O <sub>6</sub> | C <sub>17</sub> H <sub>16</sub> N <sub>4</sub> O <sub>4</sub> | C <sub>17</sub> H <sub>15</sub> N <sub>3</sub> S | C <sub>17</sub> H <sub>16</sub> ClN <sub>3</sub> O <sub>4</sub> S |
| CCDC                                 | 2171849                                                       | 2171846                                                         | 2171847                                                       | 2173492                                          | 2171850                                                           |
| Mol.wt.                              | 295.33                                                        | 395.79                                                          | 340.34                                                        | 293.38                                           | 393.84                                                            |
| Space group                          | Pca2 <sub>1</sub>                                             | P2 <sub>1</sub> /c                                              | Pbca                                                          | $\overline{P}1$                                  | Pbca                                                              |
| a(Å)                                 | 43.205(6)                                                     | 10.886(3)                                                       | 15.1546(10)                                                   | 9.4256(6)                                        | 8.241(2)                                                          |
| b(Å)                                 | 7.7050(11)                                                    | 8.2613(18)                                                      | 13.0529(9)                                                    | 9.7491(6)                                        | 17.685(5)                                                         |
| c(Å)                                 | 4.5617(6)                                                     | 20.140(5)                                                       | 16.4184(11)                                                   | 17.9657(12)                                      | 25.201(7)                                                         |
| $\alpha$ (°)                         | 90                                                            | 90                                                              | 90                                                            | 85.658(2)                                        | 90                                                                |
| $\beta$ (°)                          | 90                                                            | 98.990(6)                                                       | 90                                                            | 85.018(2)                                        | 90                                                                |
| $\gamma$ (°)                         | 90                                                            | 90                                                              | 90                                                            | 69.168(2)                                        | 90                                                                |
| V (Å <sup>3</sup> )                  | 1518.6(4)                                                     | 1789.0(7)                                                       | 3247.7(4)                                                     | 1535.35(17)                                      | 3672.9(18)                                                        |
| Density, g cm <sup>-3</sup>          | 1.292                                                         | 1.470                                                           | 1.392                                                         | 1.269                                            | 1.424                                                             |
| Abs. coeff., mm <sup>-1</sup>        | 0.087                                                         | 0.255                                                           | 0.102                                                         | 0.207                                            | 0.349                                                             |
| F (000)                              | 624                                                           | 824                                                             | 1424                                                          | 616                                              | 1632                                                              |
| Total no. of reflections             | 2570                                                          | 3124                                                            | 2397                                                          | 5374                                             | 3225                                                              |
| Reflections, I > 2 $\sigma$ (I)      | 1986                                                          | 2554                                                            | 1862                                                          | 4443                                             | 2744                                                              |
| Max. $\theta$ /°                     | 24.684                                                        | 25.046                                                          | 23.490                                                        | 25.000                                           | 24.998                                                            |
| Ranges (h, k, l)                     | -50 ≤ h ≤ 50<br>-9 ≤ k ≤ 9<br>-5 ≤ l ≤ 5                      | -12 ≤ h ≤ 12<br>-9 ≤ k ≤ 9<br>-23 ≤ l ≤ 23                      | -16 ≤ h ≤ 16<br>-14 ≤ k ≤ 14<br>-18 ≤ l ≤ 18                  | -11 ≤ h ≤ 11<br>-11 ≤ k ≤ 11<br>-21 ≤ l ≤ 21     | -9 ≤ h ≤ 9<br>-21 ≤ k ≤ 21<br>-29 ≤ l ≤ 29                        |
| Complete to 2 $\theta$ (%)           | 99.7                                                          | 99.0                                                            | 99.8                                                          | 99.4                                             | 99.8                                                              |
| Data/restraints/parameters           | 2570/1/215                                                    | 3124/0/260                                                      | 2397/0/238                                                    | 5374/1/ 395                                      | 3225/0/248                                                        |
| GooF (F <sup>2</sup> )               | 1.133                                                         | 1.053                                                           | 1.258                                                         | 1.095                                            | 1.087                                                             |
| R indices [I > 2 $\sigma$ (I)]       | 0.0890                                                        | 0.0629                                                          | 0.0669                                                        | 0.0486                                           | 0.0640                                                            |
| wR <sub>2</sub> [I > 2 $\sigma$ (I)] | 0.2066                                                        | 0.1658                                                          | 0.1166                                                        | 0.0965                                           | 0.1600                                                            |
| R indices (all data)                 | 0.1236                                                        | 0.0773                                                          | 0.0895                                                        | 0.0617                                           | 0.0753                                                            |
| wR <sub>2</sub> (all data)           | 0.2288                                                        | 0.1860                                                          | 0.1314                                                        | 0.1055                                           | 0.1666                                                            |

Table S2. Hydrogen-bond parameters in the urea/thiourea derivatives and corresponding perchlorate and nitrate salts

| Salts                                           | D-H...A                                   | $d_{D-H}$ (Å) | $d_{H...A}$ (Å) | $d_{D...A}$ (Å) | $\angle D-H...A$ (°) |
|-------------------------------------------------|-------------------------------------------|---------------|-----------------|-----------------|----------------------|
| <i>Hphenurea.ClO<sub>4</sub></i>                | N(1) -H(1) ...O(1) [3/2-x, -1/2+y, z]     | 0.85 (2)      | 2.00 (2)        | 2.833 (3)       | 166 (3)              |
|                                                 | N(2) -H(2) ...O(1) [3/2-x, -1/2+y, z]     | 0.849 (19)    | 2.30 (2)        | 3.034 (3)       | 145 (3)              |
|                                                 | N(3) -H(3) ...O(5A) [1-x,1-y,-z]          | 0.86          | 1.88            | 2.675 (10)      | 153                  |
|                                                 | N(3) -H(3) ...O(3A^B) [1-x,1-y,-z]        | 0.86          | 2.31            | 3.051 (19)      | 144                  |
|                                                 | N(3) -H(3) ...O(5A^B) [1-x,1-y,-z]        | 0.86          | 2.23            | 3.05 (3)        | 160                  |
|                                                 | C(8) -H(8B) ...O(4A) [x,y,z]              | 0.97          | 2.40            | 3.314 (8)       | 157                  |
|                                                 | C(8) -H(8B) ...O(2A^B) [x,y,z]            | 0.97          | 2.36            | 3.24 (3)        | 151                  |
|                                                 | C(11) -H(11) ...O(2A) [1/2+x,1/2-y,-z]    | 0.93          | 2.49            | 3.367 (8)       | 157                  |
| <i>Phenthiourea</i>                             | N(1) -H(1) ...S(1) [-x, -y, 1-z]          | 0.85 (2)      | 2.50 (2)        | 3.340 (2)       | 168.6 (19)           |
|                                                 | N(2) -H(2) ...N(3) [x, 1/2-y, -1/2+z]     | 0.91(2)       | 2.21 (2)        | 3.005 (3)       | 144.7(18)            |
| <i>Hphenthiourea.ClO<sub>4</sub></i>            | N(1) -H(1A) ...S(1) [1/2-x, 5/2-y, 1/2-z] | 0.86          | 2.53            | 3.355 (4)       | 162                  |
|                                                 | N(2) -H(2A) ...O(3) [x, y, z]             | 0.86          | 2.17            | 2.940 (8)       | 150                  |
|                                                 | N(3) -H(3A) ...O(4) [1/2+x, 1-y, z]       | 0.86          | 1.91            | 2.750 (10)      | 167                  |
| <i>Hphenthiourea.NO<sub>3</sub></i>             | N(1) -H(1) ...O(2) [1-x, 1/2+y, 1/2-z]    | 0.86          | 2.21            | 3.052 (3)       | 167                  |
|                                                 | N(3) -H(3) ...O(1) [x, 1/2-y, 1/2+z]      | 0.86          | 1.95            | 2.803 (3)       | 173                  |
| <i>naphurea.H<sub>2</sub>O</i>                  | N(1) -H(1A) ... O(1) [x, y, -1+z]         | 0.77 (9)      | 2.15 (9)        | 2.858 (9)       | 153 (8)              |
|                                                 | N(2) -H(2A) ...O(1) [x, y, -1+z]          | 0.83 (9)      | 2.12(9)         | 2.873 (9)       | 151 (7)              |
|                                                 | O(2) -H(2C) ...O(2) [1/2-x, y, -1/2+z]    | 0.82 (12)     | 1.94 (12)       | 2.750 (11)      | 172 (9)              |
|                                                 | O(2) -H(2D) ...N(3) [x, 1+y, -1+z]        | 0.86 (9)      | 2.03 (10)       | 2.873 (11)      | 170 (8)              |
| <i>Hnaphurea.ClO<sub>4</sub>.H<sub>2</sub>O</i> | O(6) -H(6A) ...O(1) [x, 1+y, z]           | 0.85          | 2.04            | 2.892 (4)       | 177                  |
|                                                 | N(1) -H(1) ...O(1) [1-x, 1/2+y, 1/2-z]    | 0.86          | 2.22            | 3.010 (3)       | 153                  |
|                                                 | O(6) -H(6B) ...O(2) [x, 1+y, z]           | 0.85          | 2.40            | 3.183 (7)       | 154                  |
|                                                 | N(2) -H(2) ...O(1) [1-x, 1/2+y, 1/2-z]    | 0.86          | 2.17            | 2.975 (3)       | 156                  |
|                                                 | N(3) -H(3) ...O(6) [-x, -1/2+y, 1/2-z]    | 0.86          | 1.89            | 2.723 (5)       | 164                  |

|                                      |                                           |          |            |            |            |
|--------------------------------------|-------------------------------------------|----------|------------|------------|------------|
|                                      | C(4) -H(4) ...O(2A^B) [1-x, -y, -z]       | 0.93     | 2.58       | 3.50 (4)   | 169        |
|                                      | C(14) -H(14) ...O(2) [x, y, z]            | 0.93     | 2.51       | 3.377 (7)  | 156        |
|                                      | C(15) -H(15) ...O(5A^B) [x, y, z]         | 0.93     | 2.33       | 3.10 (2)   | 141        |
|                                      | C(16) -H(16) ...O(4A^B) [x, 1/2-y, 1/2+z] | 0.93     | 2.56       | 3.349 (7)  | 143        |
| <i>Hnaphurea.NO<sub>3</sub></i>      | N(1) -H(1) ...O(2) [x, 1/2-y, -1/2+z]     | 0.86 (3) | 2.01 (3)   | 2.860 (4)  | 170 (4)    |
|                                      | N(2) -H(2) ...O(3) [x, 1/2-y, -1/2+z]     | 0.87 (4) | 2.05 (4)   | 2.903 (4)  | 169 (3)    |
|                                      | N(3) -H(3) ...O(1) [-1/2+x, y, 1/2-z]     | 1.04 (5) | 1.63 (5)   | 2.663 (4)  | 170 (4)    |
|                                      | C(15) -H(15) ...O(4) [-1/2+x, y, 1/2-z]   | 0.93     | 2.58       | 3.506 (4)  | 171        |
| <i>naphthiourea</i>                  | N(1) -H(1) ...S(1) [1-x, -y, 1-z]         | 0.82 (3) | 2.60 (3)   | 3.391(2)   | 164 (3)    |
|                                      | N(2) -H(2) ...N(6) [-x, 1-y, 1-z]         | 0.84 (2) | 2.145 (19) | 2.888 (3)  | 147.1 (17) |
|                                      | N(4) -H(4A) ...S(2) [1-x, -y, -z]         | 0.82 (3) | 2.61 (3)   | 3.415 (2)  | 169 (2)    |
|                                      | N(5) -H(5) ...N(3) [1-x, 1-y, 1-z]        | 0.80 (3) | 2.13 (3)   | 2.888 (4)  | 158 (2)    |
| <i>Hnaphthiourea.ClO<sub>4</sub></i> | N(1) -H(1) ...S(1) [-1/2+x, y, 1/2-z]     | 0.86     | 2.46       | 3.264 (3)  | 157        |
|                                      | N(2) -H(2) ...O(3A) [x, y, z]             | 0.86     | 2.26       | 3.053 (10) | 152        |
|                                      | N(2) -H(2) ...O(3A^B) [x, y, z]           | 0.86     | 2.31       | 3.02 (4)   | 140        |
|                                      | N(3) -H(3) ...O(3A) [1/2-x, 1/2+y, z]     | 0.86     | 2.01       | 2.847 (10) | 164        |
|                                      | N(3) -H(3) ...O(3A^B) [1/2-x, 1/2+y, z]   | 0.86     | 2.06       | 2.83 (4)   | 148        |
|                                      | N(3) -H(3) ...O(4A^B) [1/2-x, 1/2+y, z]   | 0.86     | 2.40       | 3.122 (19) | 142        |
|                                      | C(15) -H(15) ...O(4A^B) [-x, 1-y, -z]     | 0.93     | 2.47       | 3.279 (18) | 145        |

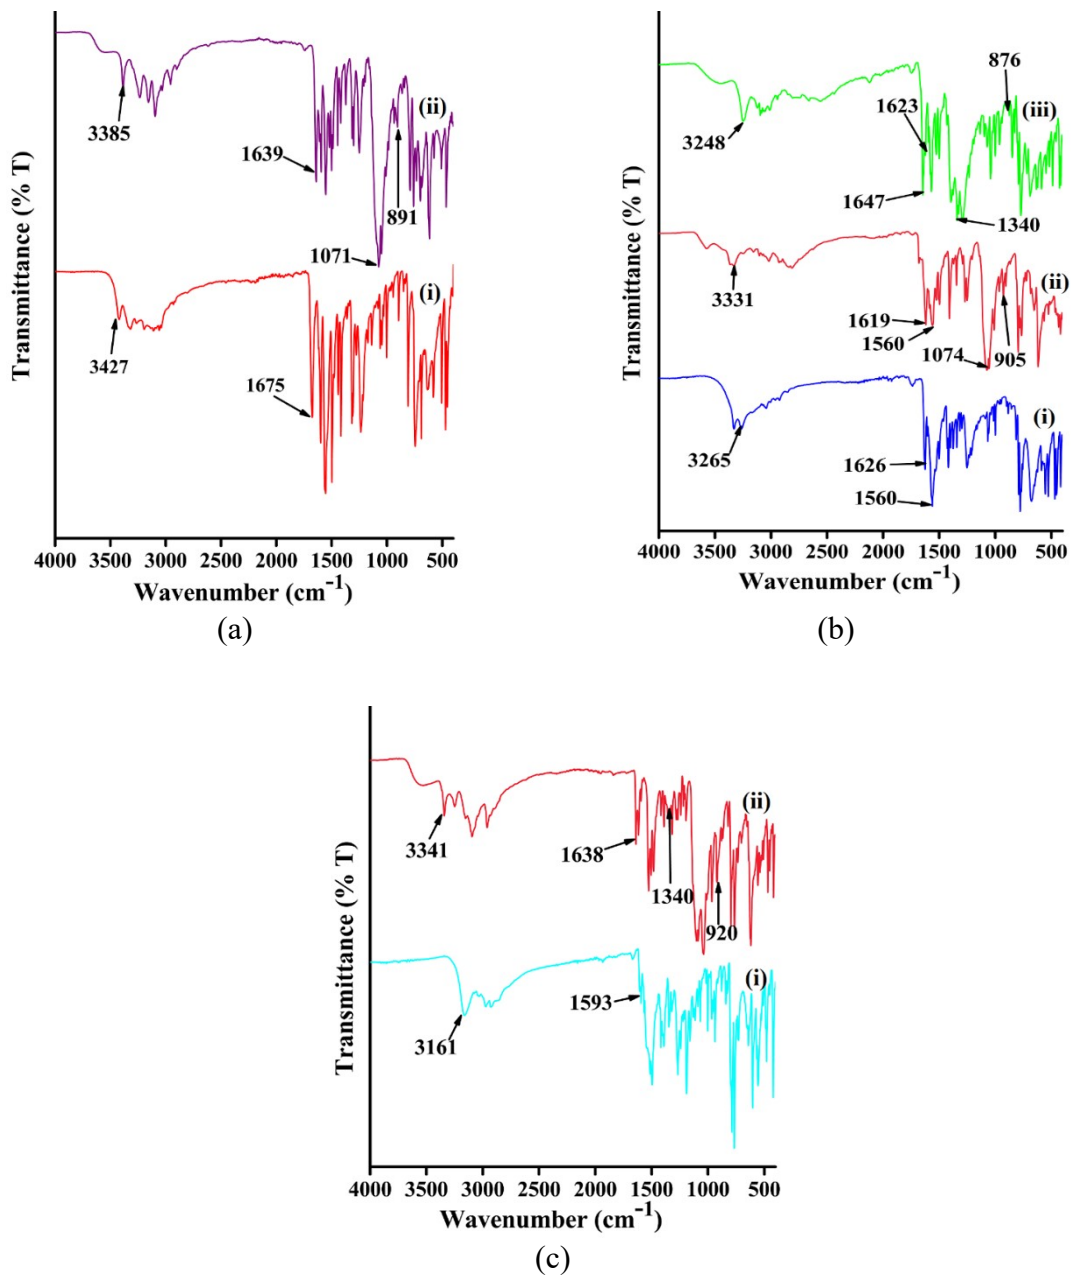

Figure S1. IR-spectra of the solid samples of (a) (i) *phenurea.H<sub>2</sub>O*, (ii) *Hphenurea.ClO<sub>4</sub>*, (b) (i) *naphurea.H<sub>2</sub>O*, (ii) *Hnaphurea.ClO<sub>4</sub>.H<sub>2</sub>O*, (iii) *Hnaphurea.NO<sub>3</sub>*; (c) (i) *naphthiourea*, (ii) *Hnaphthiourea ClO<sub>4</sub>*.

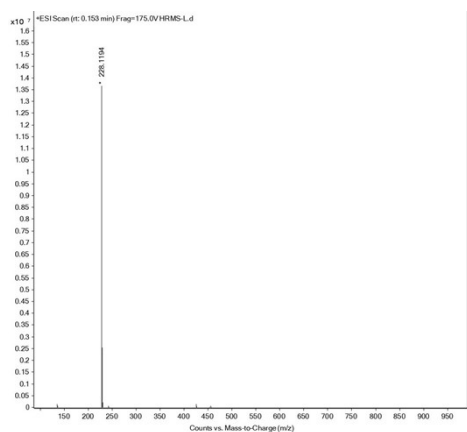

(a)

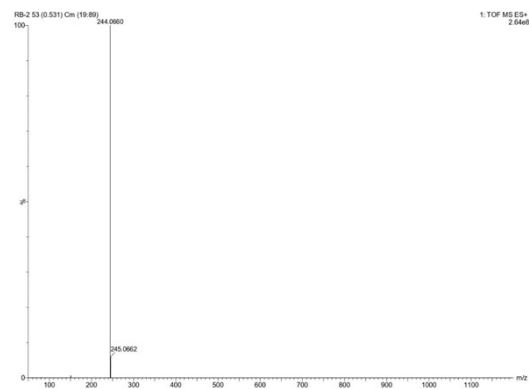

(b)

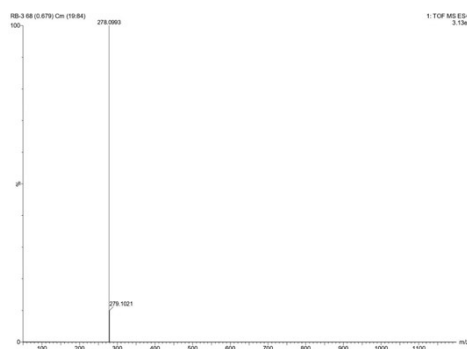

(c)

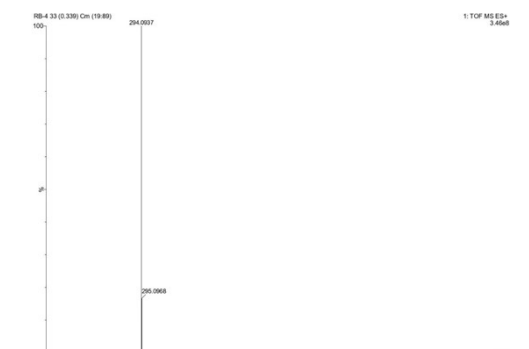

(d)

Figure S2. ESI mass of the (a) *phenurea*, (b) *phenthiourea*, (c) *naphurea* and (d) *naphthiourea*.

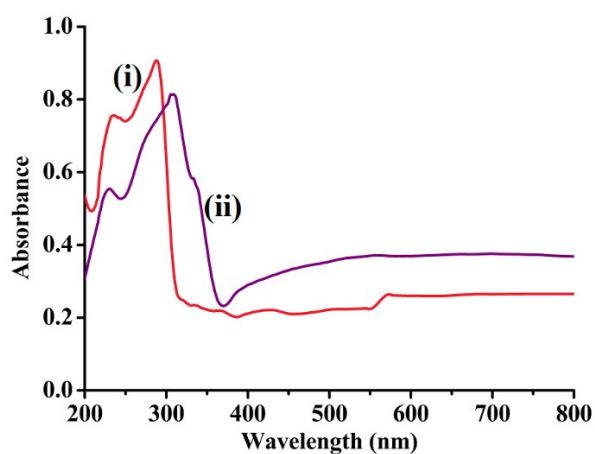

(a)

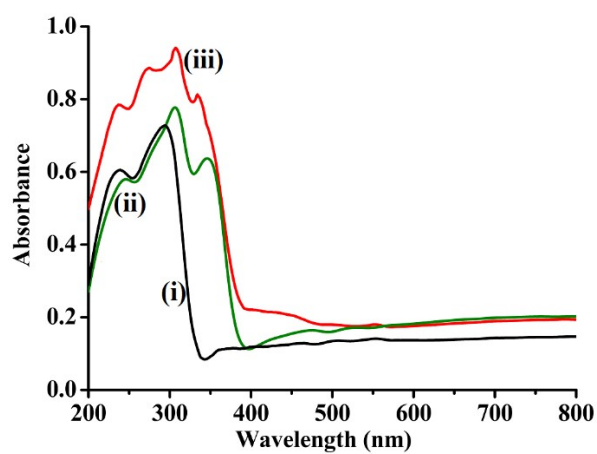

(b)



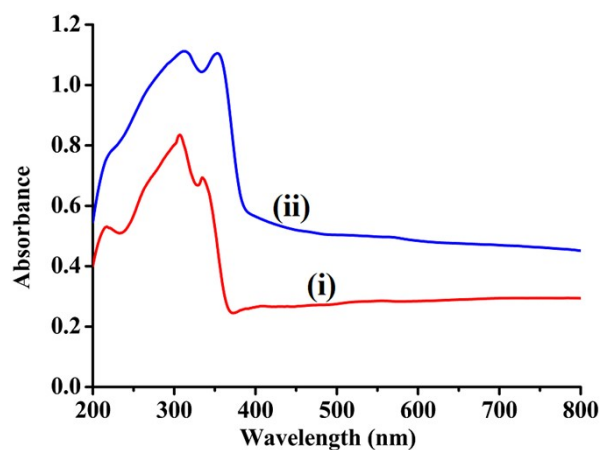

(c)

Figure S3. UV-vis spectra of solid samples of (a) *phenurea.H<sub>2</sub>O* ( $\lambda_{\max} = 291$  nm), *Hphenurea.ClO<sub>4</sub>* ( $\lambda_{\max} = 309$  nm), (b) (i) *phenthiourea* ( $\lambda_{\max} = 295$  nm), (ii) *Hphenthiourea.ClO<sub>4</sub>* ( $\lambda_{\max} = 307$  nm), (iii) *Hphenthiourea.NO<sub>3</sub>* ( $\lambda_{\max} = 307$  nm), (c) (i) *naphthiourea* ( $\lambda_{\max} = 306$  nm), (ii) *Hnaphthiourea.ClO<sub>4</sub>* ( $\lambda_{\max} = 312$  nm, 353 nm).

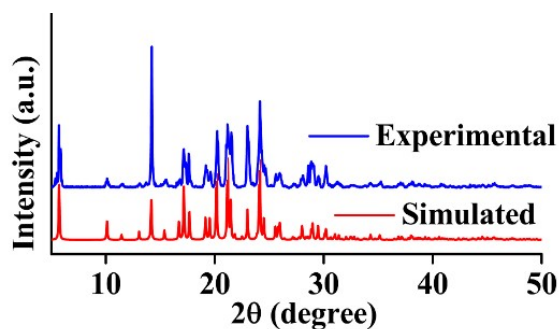

(a)

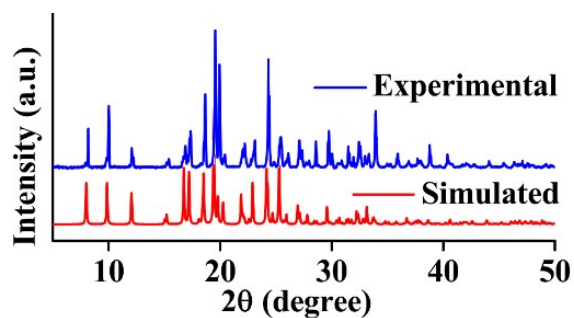

(b)

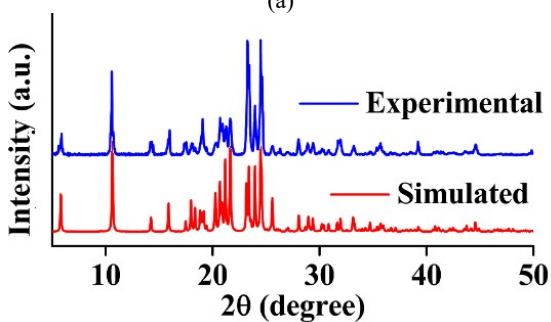

(c)

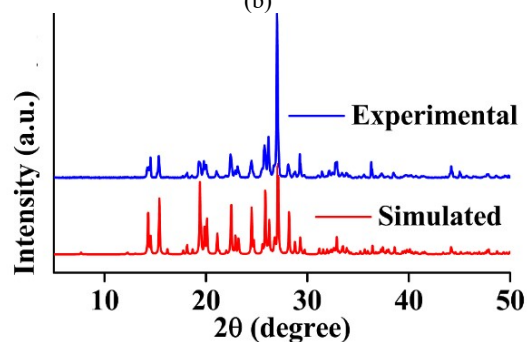

(d)

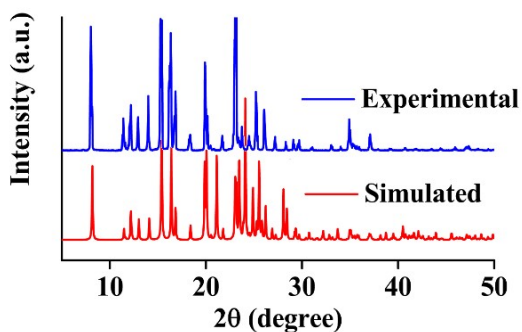

(e)

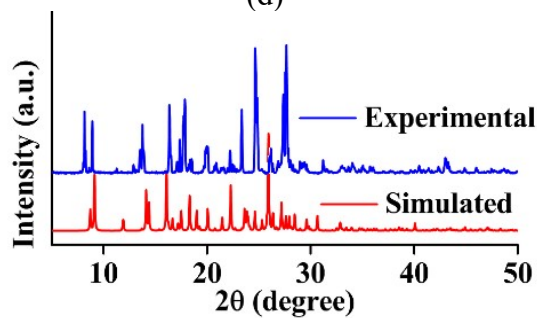

(f)

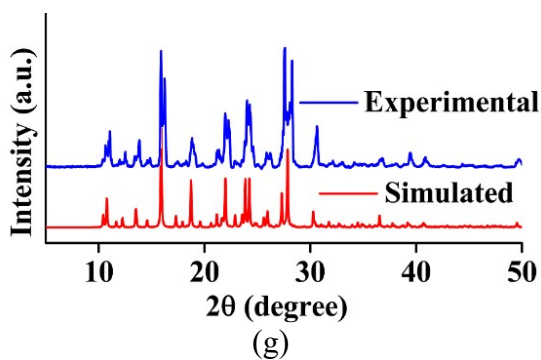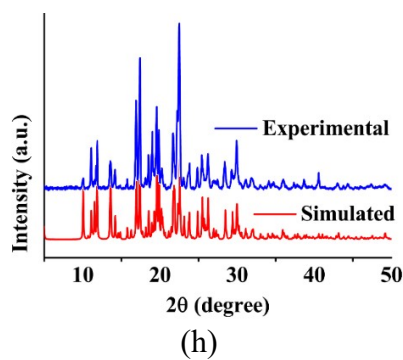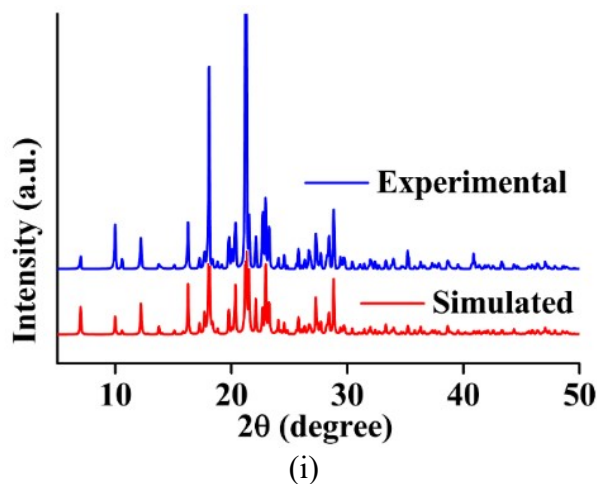

Figure S4. Powder X-ray diffraction patterns of (a) *Hphenurea.ClO<sub>4</sub>*, (b) *phenthiourea*, (c) *Hphenthiourea.ClO<sub>4</sub>*, (d) *Hphenthiourea.NO<sub>3</sub>*, (e) *naphurea.H<sub>2</sub>O*, (f) *Hnaphurea.ClO<sub>4</sub>.H<sub>2</sub>O*, (g) *Hnaphurea.NO<sub>3</sub>*, (h) *naphthiourea*, (i) *Hnaphthiourea.ClO<sub>4</sub>*.

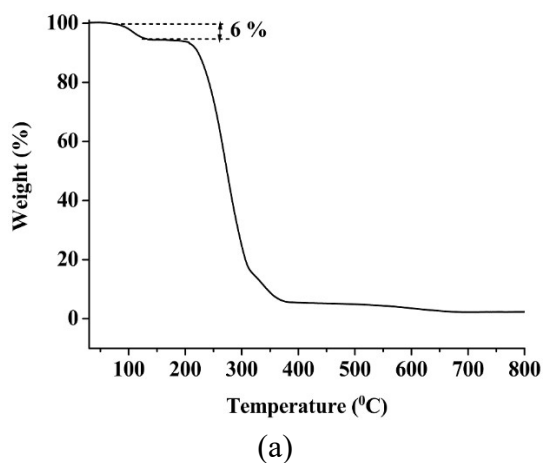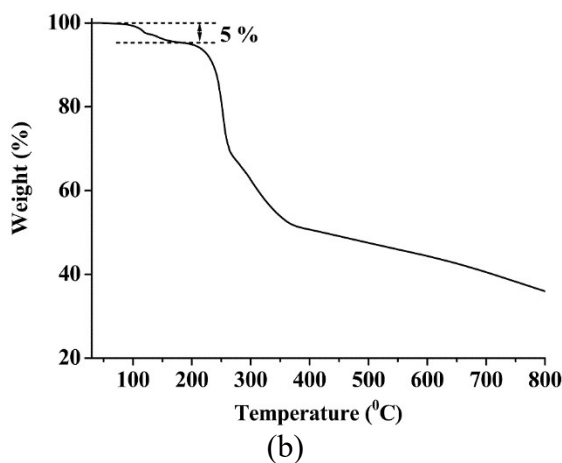

Figure S5. Thermogram of (a) *naphurea.H<sub>2</sub>O*, (b) *Hnaphurea.ClO<sub>4</sub>.H<sub>2</sub>O* (heating rate 10°C/min).

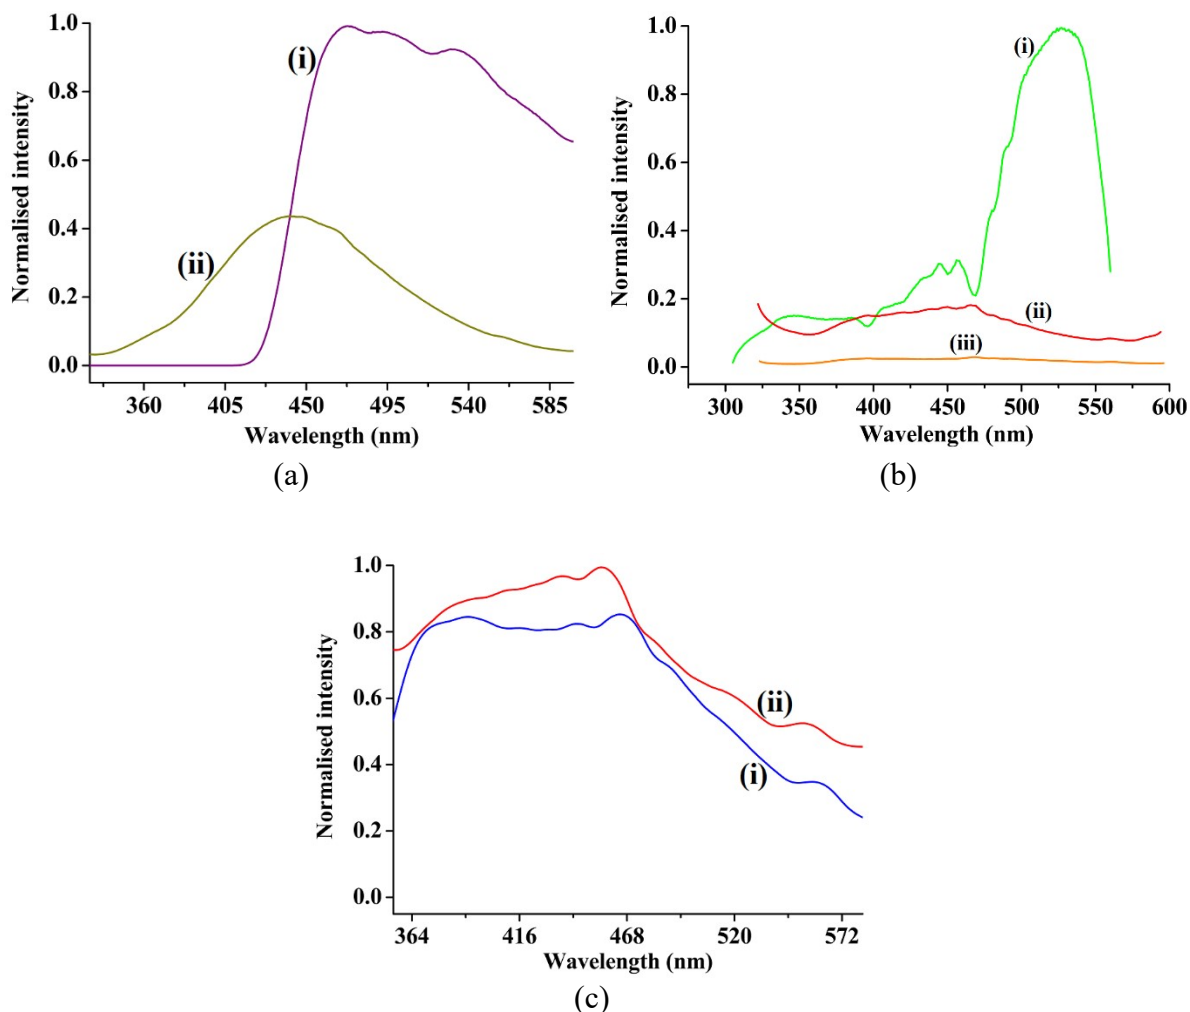

Figure S6. Solid-state photoluminescence spectra of (a) (i) *phenurea.H<sub>2</sub>O* ( $\lambda_{\text{ex}} = 330$  nm,  $\lambda_{\text{em}} = 473$  nm, 492 nm, 530 nm), (ii) *Hphenurea.ClO<sub>4</sub>* ( $\lambda_{\text{ex}} = 309$  nm,  $\lambda_{\text{em}} = 440$  nm); (b) (i) *phenthiourea* ( $\lambda_{\text{ex}} = 295$  nm,  $\lambda_{\text{em}} = 530$  nm), (ii) *Hphenthiourea.ClO<sub>4</sub>* ( $\lambda_{\text{ex}} = 307$  nm,  $\lambda_{\text{em}} = 468$  nm), (iii) *Hphenthiourea.NO<sub>3</sub>* ( $\lambda_{\text{ex}} = 307$  nm,  $\lambda_{\text{em}} = 468$  nm); (c) (i) *naphththiourea* ( $\lambda_{\text{ex}} = 306$  nm,  $\lambda_{\text{em}} = 468$  nm), (ii) *Hnaphththiourea.ClO<sub>4</sub>* ( $\lambda_{\text{ex}} = 321$  nm,  $\lambda_{\text{em}} = 468$  nm).

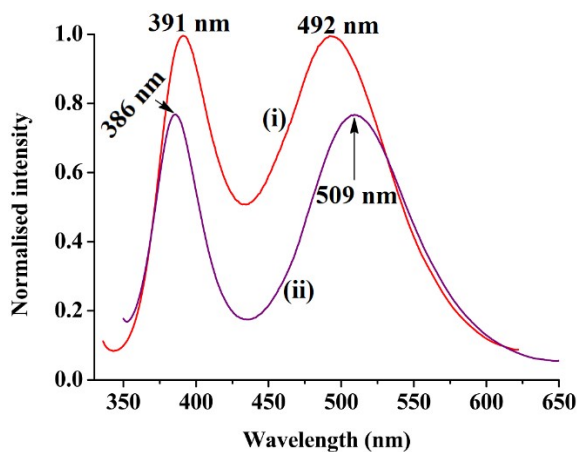

Figure S7. Solid-state photoluminescence spectra of *Hnaphhurea.NO<sub>3</sub>* (i)  $\lambda_{\text{ex}} = 321$  nm,  $\lambda_{\text{em}} = 391$  nm, 492 nm and (ii)  $\lambda_{\text{ex}} = 335$  nm,  $\lambda_{\text{em}} = 386$  nm, 509 nm.

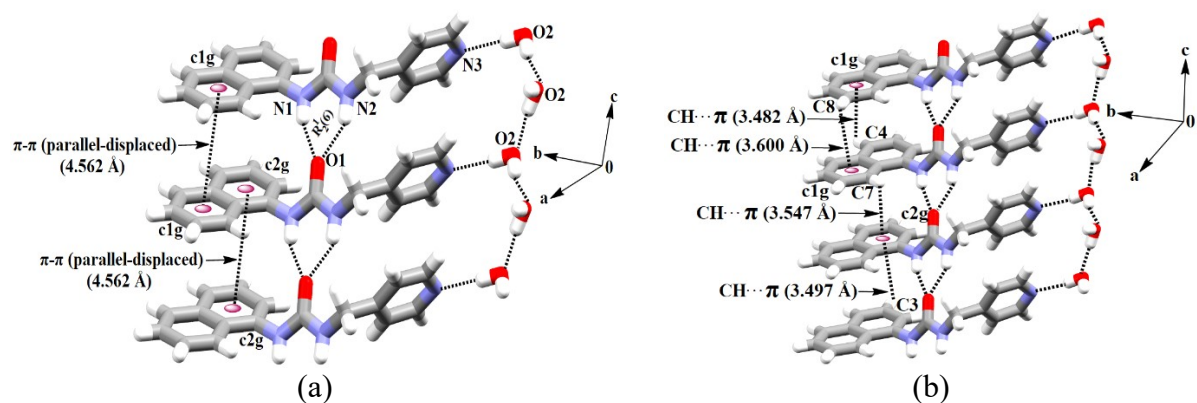

Figure S8. (a) Arrangements of the naphthalene rings and (b) the C-H... $\pi$  interactions in *naphurea.H<sub>2</sub>O*.

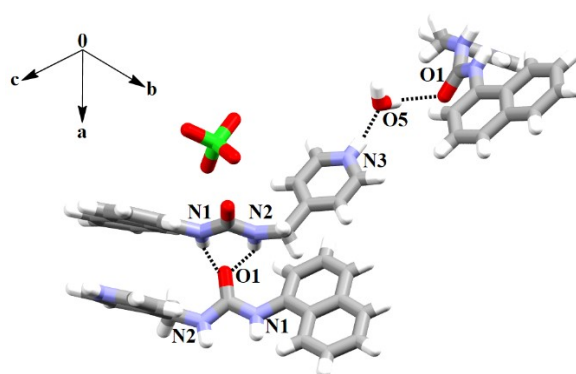

Figure S9. Free perchlorate anion and the urea tapes showing the projections of the carbonyls in the *Hnaphurea.ClO<sub>4</sub>.H<sub>2</sub>O*.

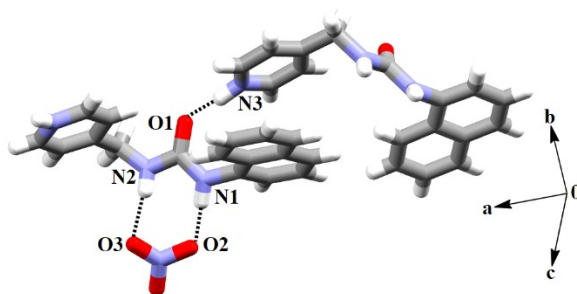

Figure S10. Hydrogen bond environment of nitrate ion in the *Hnaphurea.NO<sub>3</sub>*.

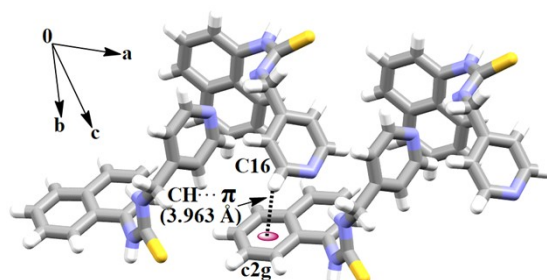

Figure S11. C-H... $\pi$  interaction in the self-assembly of *Hnaphthiourea*.

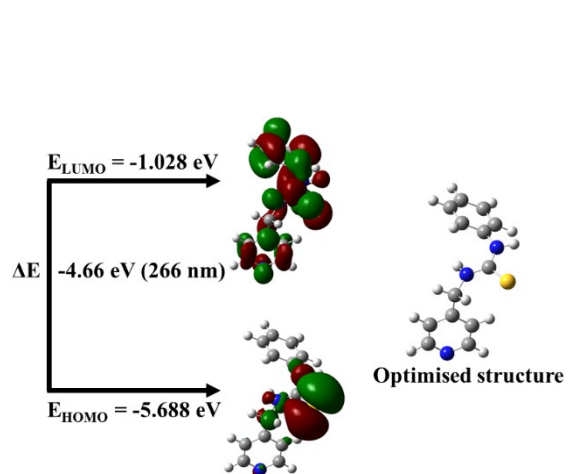

(a)

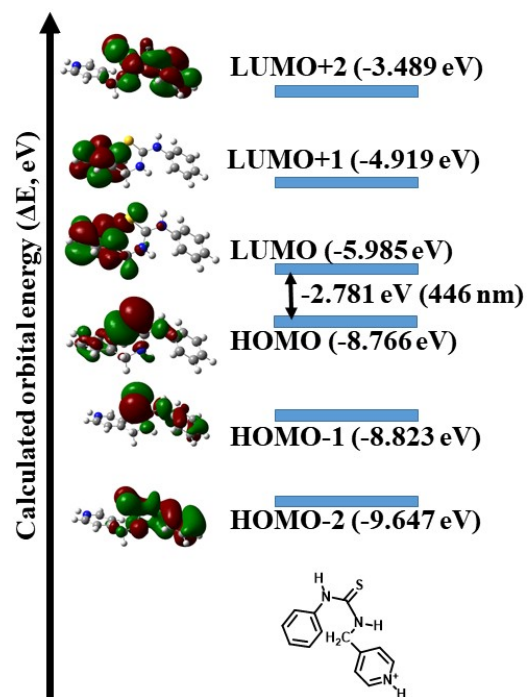

(b)

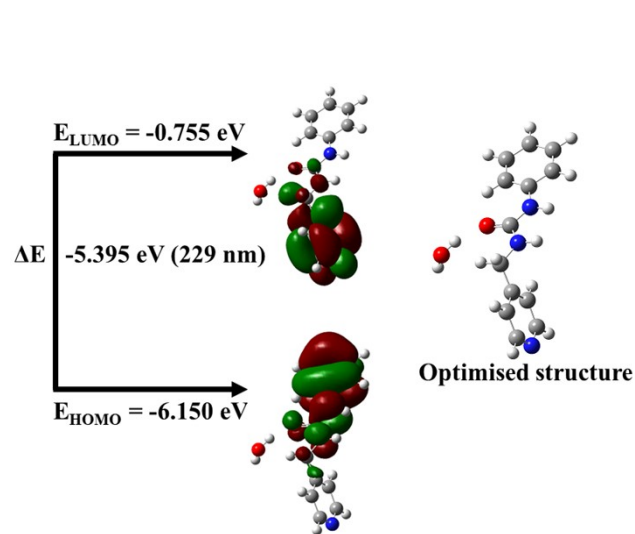

(c)

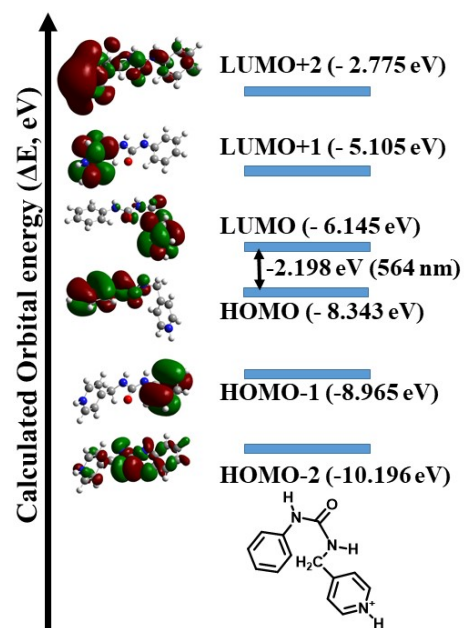

(d)

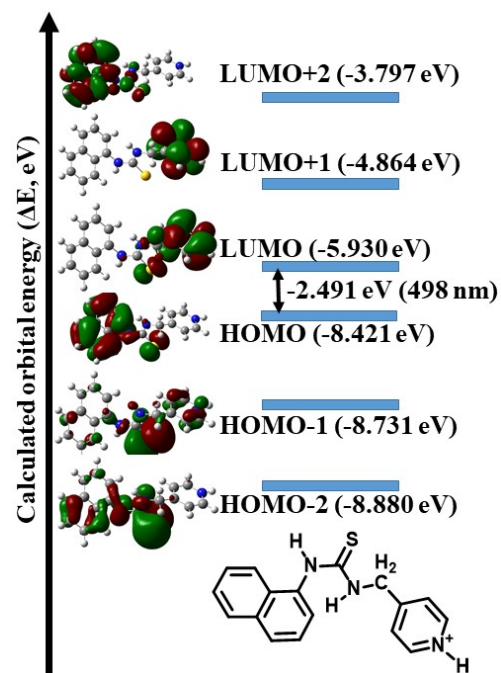

(e)

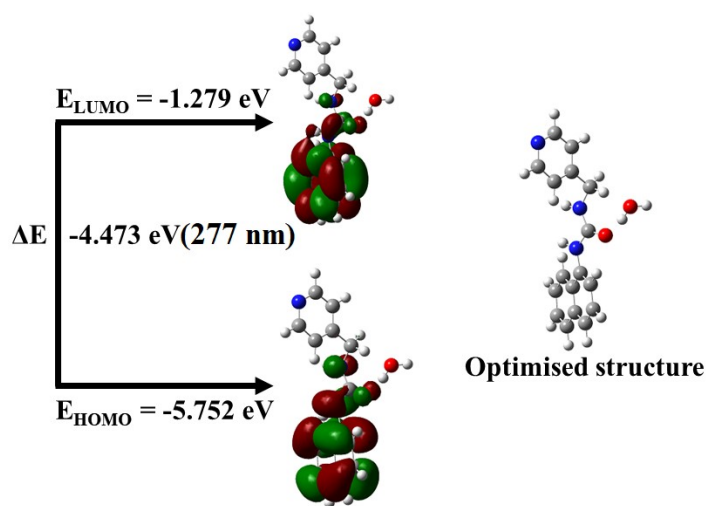

(g)

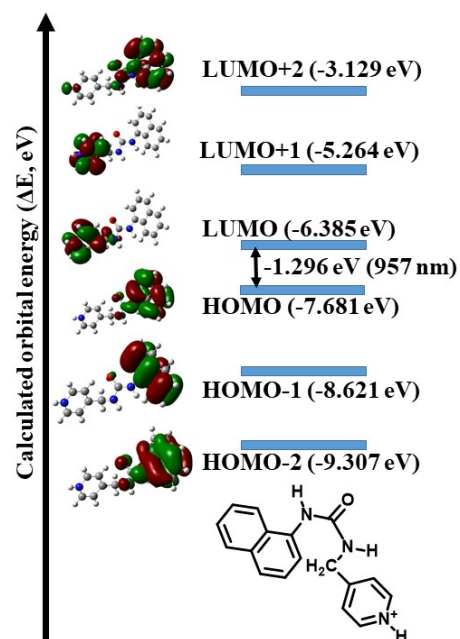

(f)

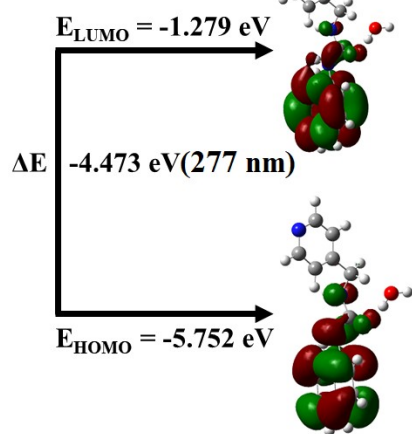

(h)

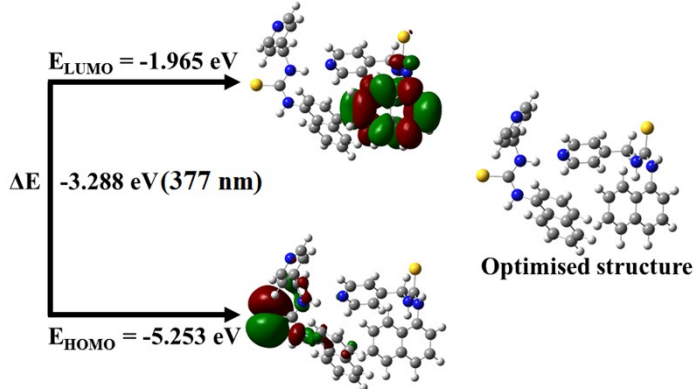

Figure S12. Electronic energy levels calculated by DFT showing the HOMO-LUMO gap in (a) *phenthiourea*, (b) *Hphenthiourea* cation, (c) *phenurea.H<sub>2</sub>O*, (d) *Hphenurea* cation, (e) *naphthiourea*, (f) *Hnaphthiourea* cation, (g) *naphurea.H<sub>2</sub>O*, (h) *Hnaphurea* cation.

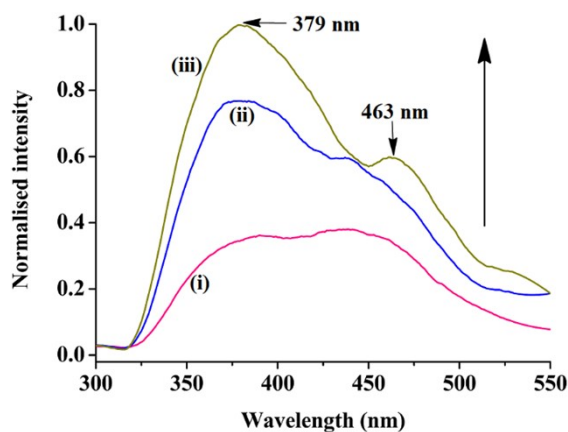

Figure S13. The changes in emission spectra of *Hnaphurea.NO<sub>3</sub>* in water upon addition of water (10  $\mu\text{L}$  aliquots) ( $\lambda_{\text{ex}} = 258 \text{ nm}$ ).

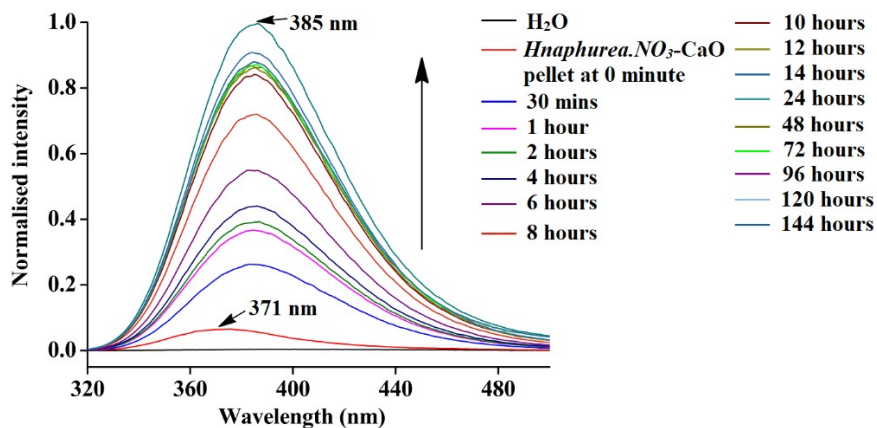

Figure S14. Changes in the emission spectra of supernatant water upon release of *naphurea* from *Hnaphurea.NO<sub>3</sub>@CaO* pellet in water ( $\lambda_{\text{ex}} = 258 \text{ nm}$ ).

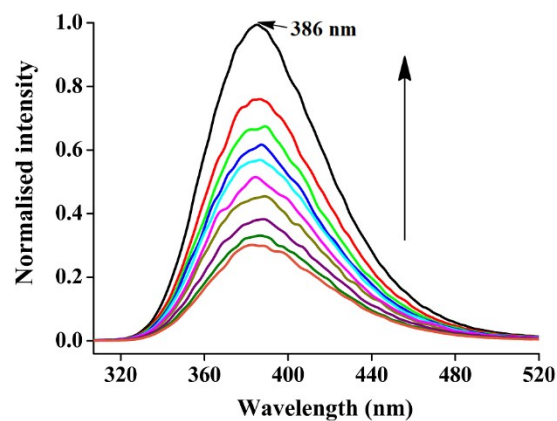

Figure S15. Fluorescence spectroscopic titration ( $\lambda_{\text{ex}} = 258 \text{ nm}$ ) of *Hnaphurea.ClO<sub>4</sub>.H<sub>2</sub>O* (10  $\mu\text{M}$ ) in water upon addition of NaAsO<sub>2</sub> (As in +3 oxidation state) (10  $\mu\text{M}$  in 10  $\mu\text{L}$  aliquots) showing enhancement of emission.

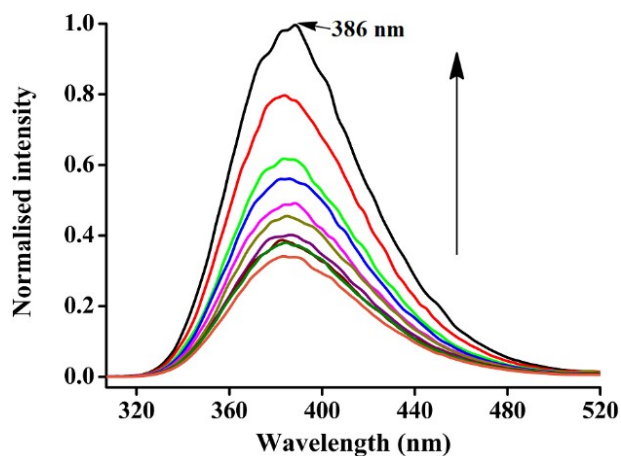

Figure S16. Fluorescence spectroscopic titration ( $\lambda_{\text{ex}} = 258 \text{ nm}$ ) of *Hnaphurea.ClO<sub>4</sub>.H<sub>2</sub>O* (10  $\mu\text{M}$ ) in water upon addition of NaHAsO<sub>4</sub>·7H<sub>2</sub>O (As in +5 oxidation state) (10  $\mu\text{M}$  in 10  $\mu\text{L}$  aliquots) showing enhancement of emission.

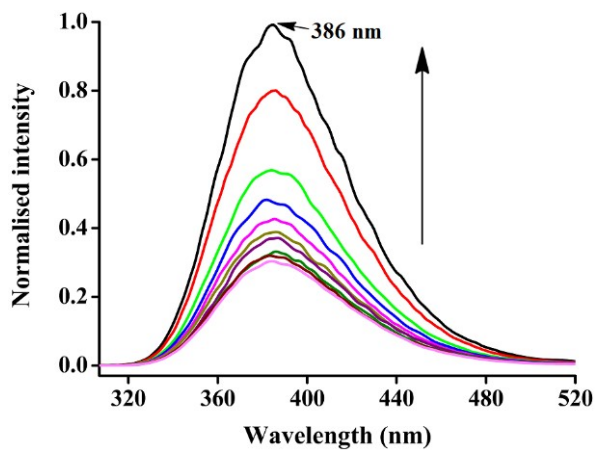



Figure S17. Fluorescence spectroscopic titration ( $\lambda_{\text{ex}} = 258 \text{ nm}$ ) of *Hnaphurea.ClO<sub>4</sub>.H<sub>2</sub>O* (10  $\mu\text{M}$ ) in water upon addition of NaOH (10  $\mu\text{M}$  in 10  $\mu\text{L}$  aliquots) showing enhancement of emission.

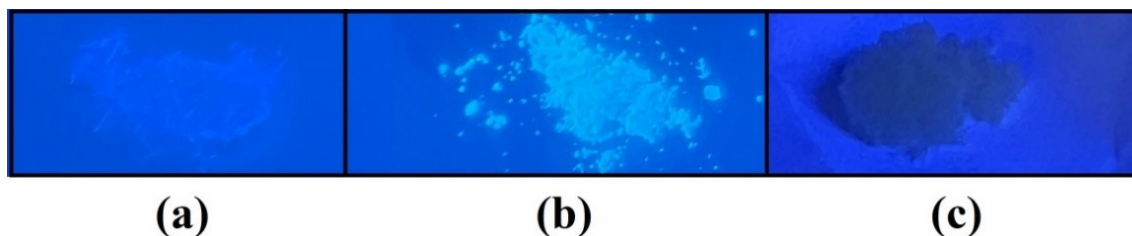

Figure S18. Photograph of solid samples of (a) *naphurea.H<sub>2</sub>O*, (b) *Hnaphurea.ClO<sub>4</sub>.H<sub>2</sub>O*, (c) *Hnaphurea.NO<sub>3</sub>* under UV lamp at 365 nm.

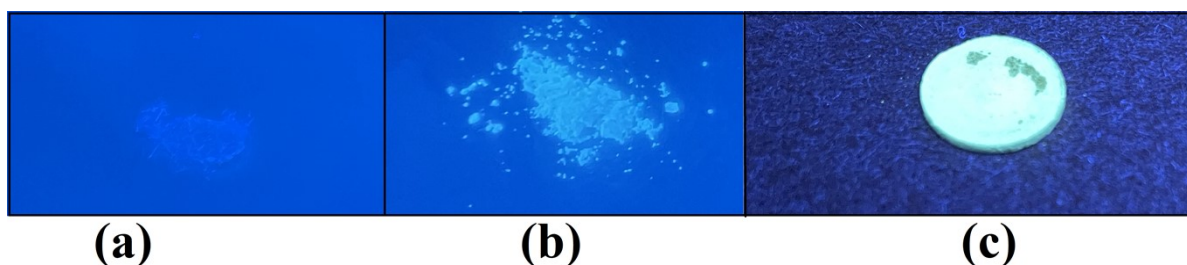

Figure S19. Photograph of solid samples of (a) *naphurea.H<sub>2</sub>O*, (b) *Hnaphurea.ClO<sub>4</sub>.H<sub>2</sub>O*, (c) *Hnaphurea.ClO<sub>4</sub>.H<sub>2</sub>O@CaO* pellet (1:1 ratio) under UV-lamp at 365 nm.

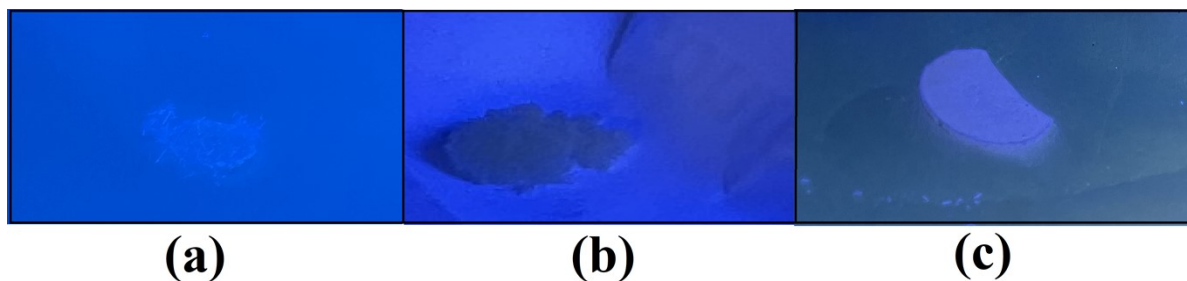

Figure S20. Photograph of solid samples of (a) *naphurea.H<sub>2</sub>O*, (b) *Hnaphurea.NO<sub>3</sub>*, (c) *Hnaphurea.NO<sub>3</sub>@CaO* (1:1 ratio) pellet under UV-lamp at 365 nm.

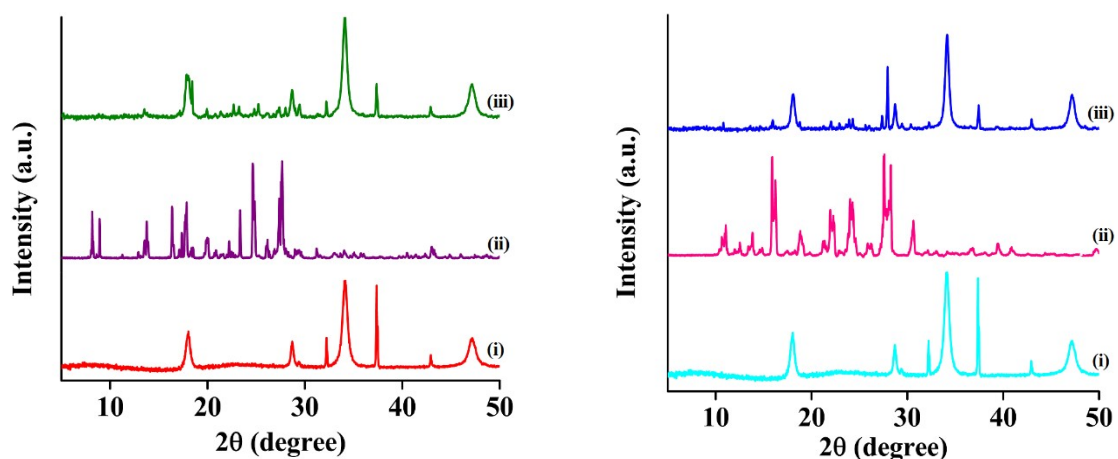

Figure S21. Powder X-ray diffraction patterns of (a) (i) CaO, (ii) *Hnaphurea*.ClO<sub>4</sub>.H<sub>2</sub>O, (iii) CaO@*Hnaphurea*.ClO<sub>4</sub>.H<sub>2</sub>O (1:1 ratio); (b) (i) CaO, (ii) *Hnaphurea*.NO<sub>3</sub>, (iii) CaO@*Hnaphurea*.NO<sub>3</sub> (1:1 ratio).

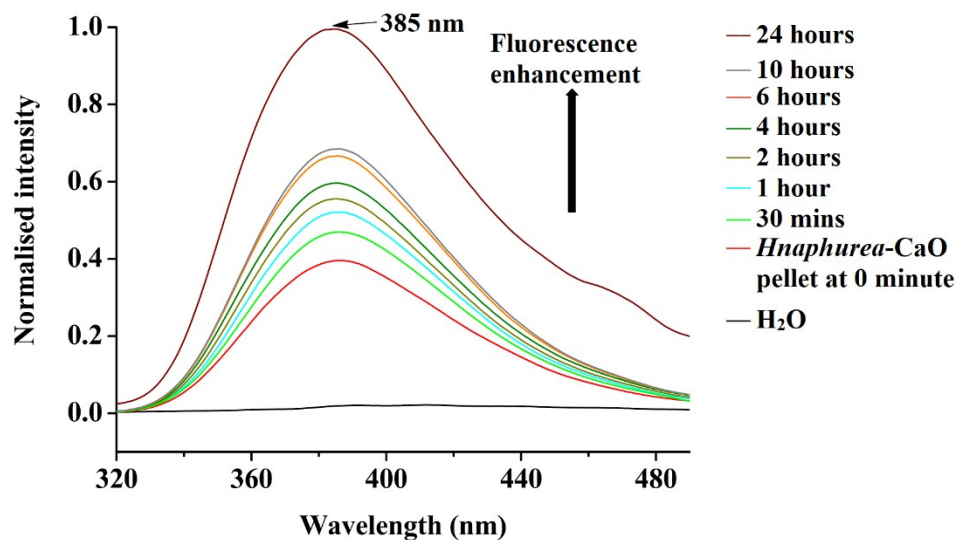

Figure S22. Changes in the fluorescence emission during the release of *naphurea* from *Hnaphurea*@CaO pellet (1:1 ratio) in water ( $\lambda_{\text{ex}} = 258 \text{ nm}$ ).

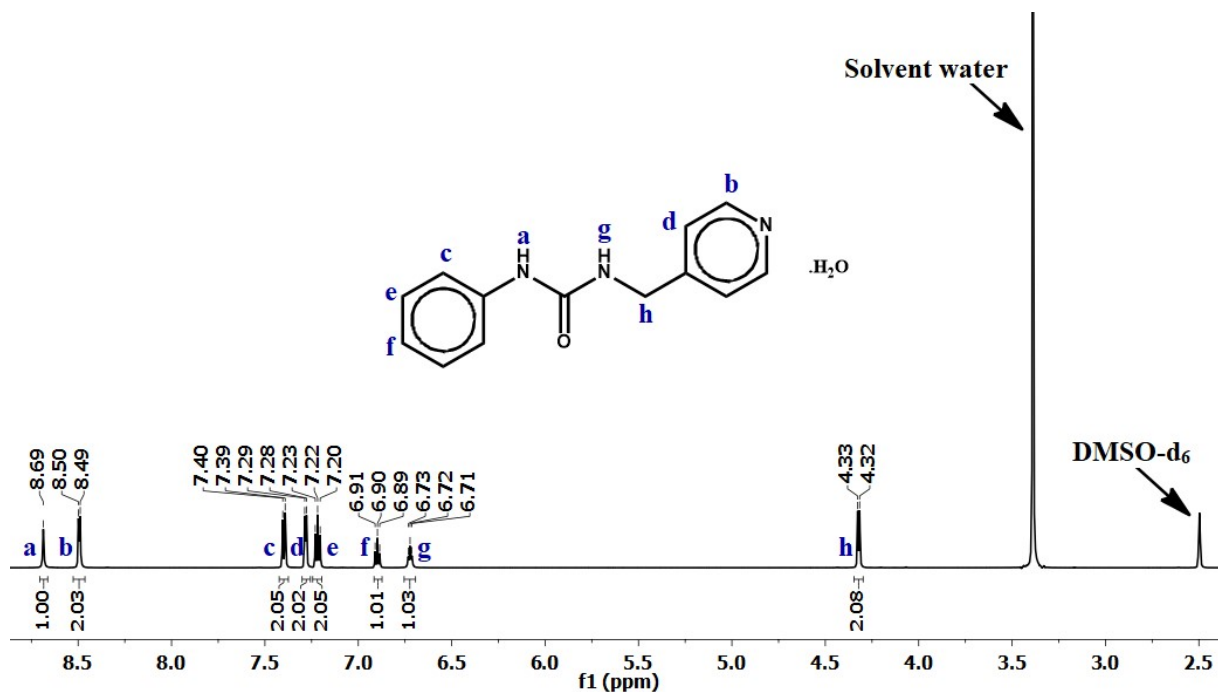

Figure S23. <sup>1</sup>H-NMR (600 MHz, DMSO-d<sub>6</sub>) spectrum of *phenurea*.H<sub>2</sub>O.



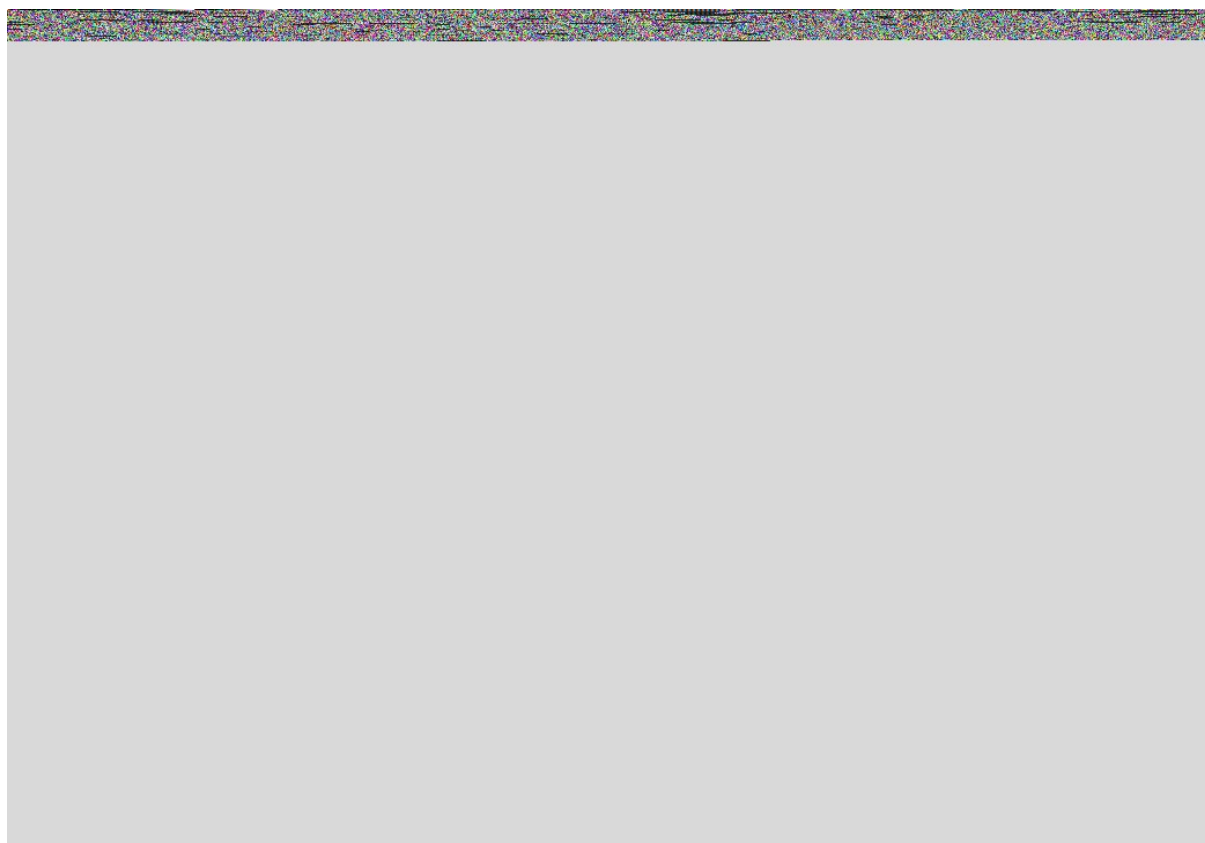

Figure S26.  $^1\text{H-NMR}$  (500 MHz,  $\text{DMSO-d}_6$ ) spectrum of *naphthiourea*.

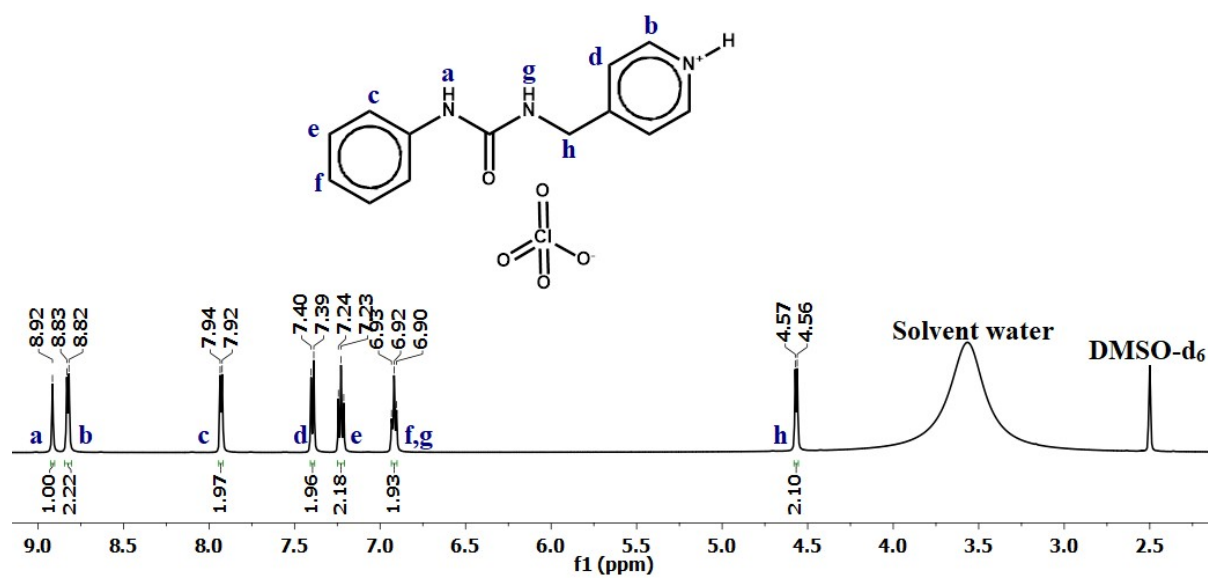

Figure S27.  $^1\text{H-NMR}$  (500 MHz,  $\text{DMSO-d}_6$ ) spectrum of *Hphenurea.ClO<sub>4</sub>*.

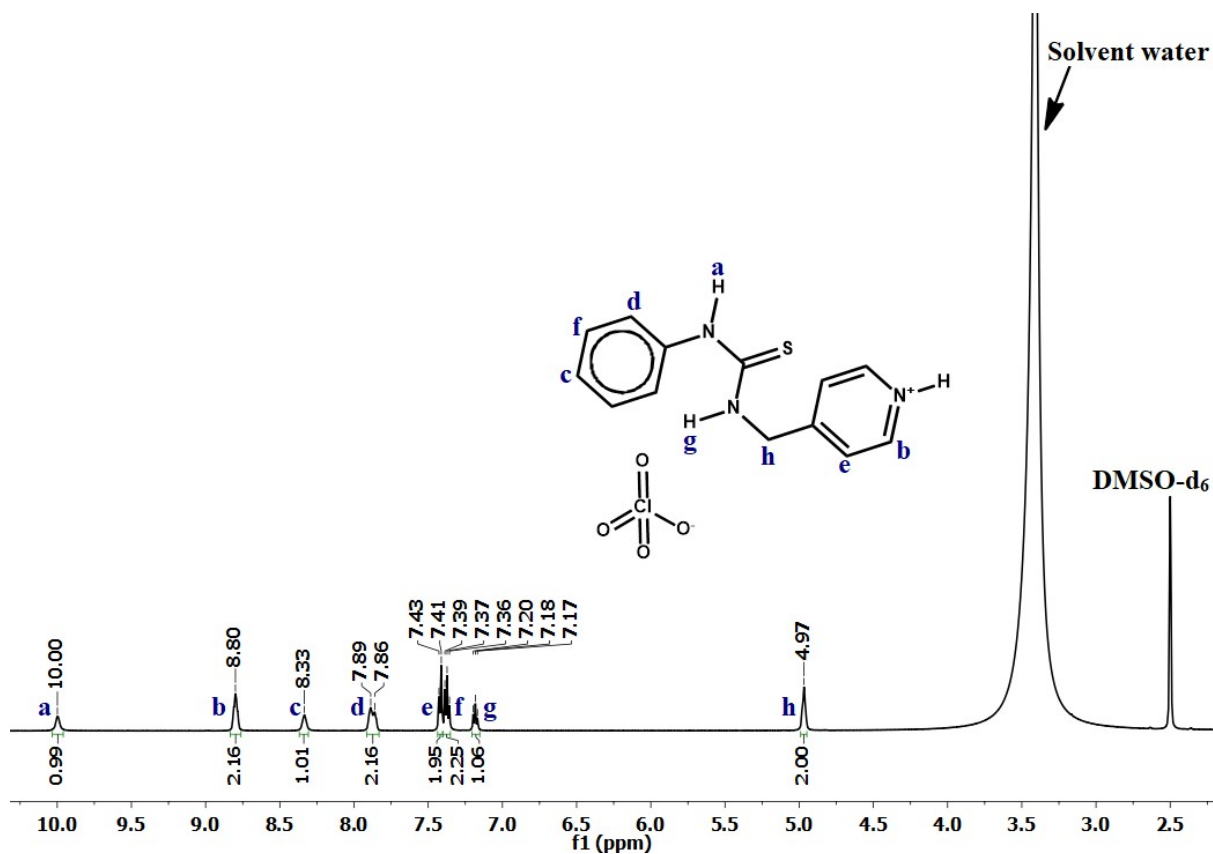

Figure S28.  $^1\text{H-NMR}$  (500 MHz,  $\text{DMSO-d}_6$ ) spectrum of *Hphenthiourea.C1O4*.

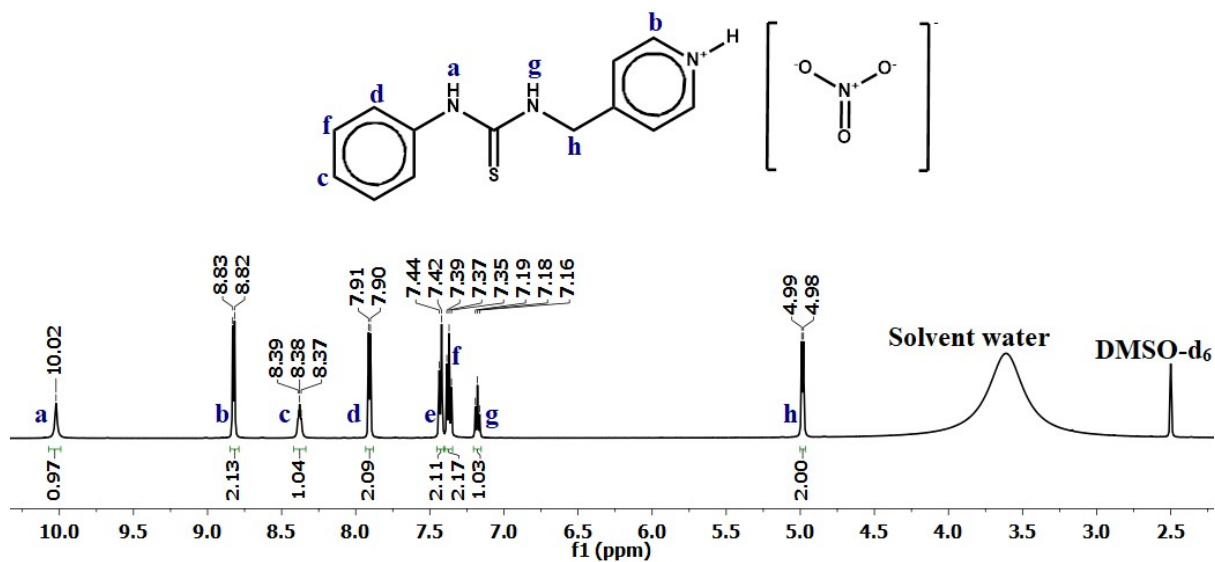

Figure S29.  $^1\text{H-NMR}$  (500 MHz,  $\text{DMSO-d}_6$ ) spectrum of *Hphenthiourea.NO3*.

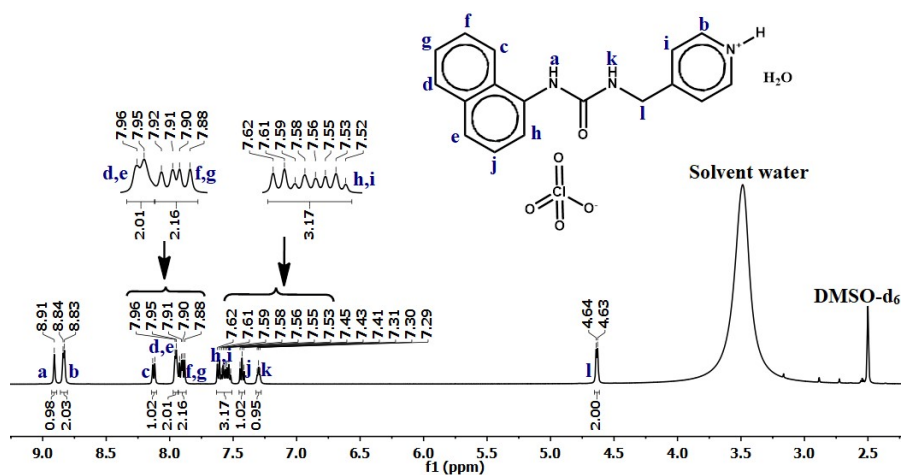

Figure S30. <sup>1</sup>H-NMR (500 MHz, DMSO-d<sub>6</sub>) spectrum of *Hnaphurea*.ClO<sub>4</sub>.H<sub>2</sub>O.

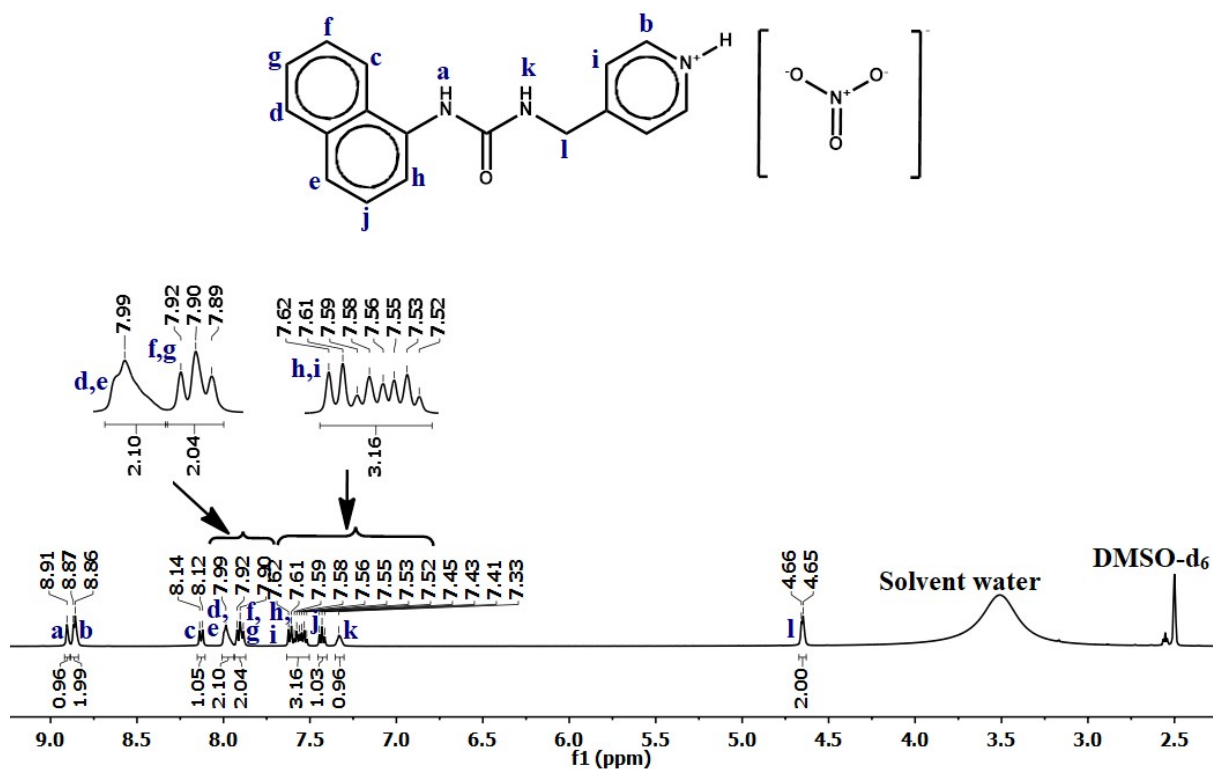

Figure S31. <sup>1</sup>H-NMR (500 MHz, DMSO-d<sub>6</sub>) spectrum of *Hnaphurea*.NO<sub>3</sub>.

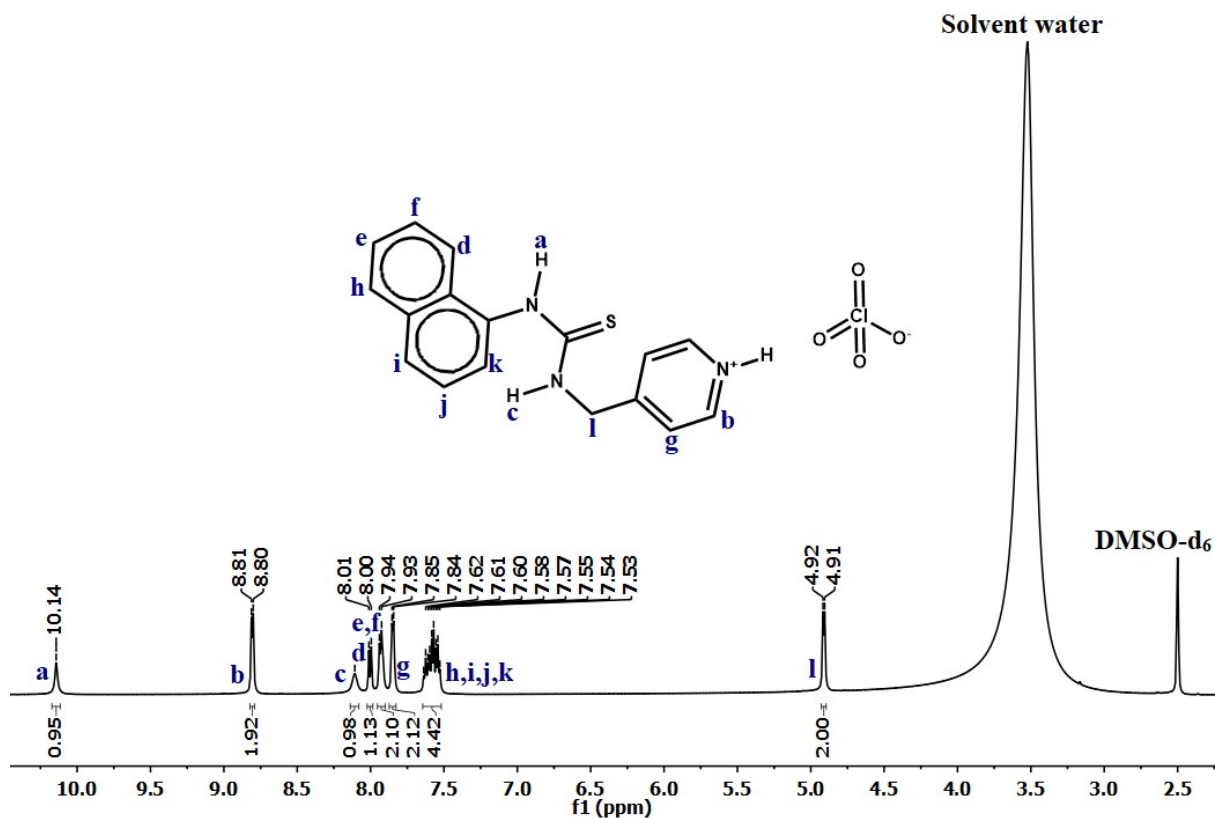

Figure S32.  $^1\text{H-NMR}$  (500 MHz,  $\text{DMSO-d}_6$ ) spectrum of *Hnaphthiourea.ClO\_4*.

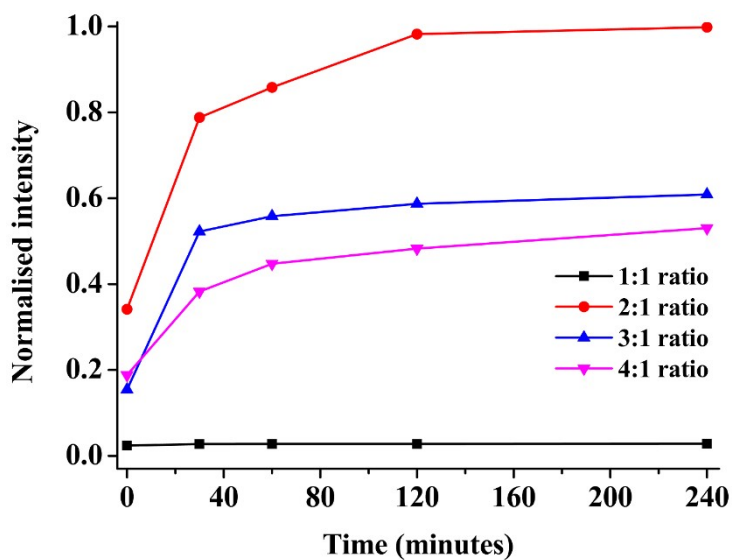

Figure S33. Intensity versus time curve of different ratios of *Hnaphthiourea@CaO* pellets in water ( $\lambda_{\text{ex}} = 258 \text{ nm}$ ,  $\lambda_{\text{em}} = 385 \text{ nm}$ ).

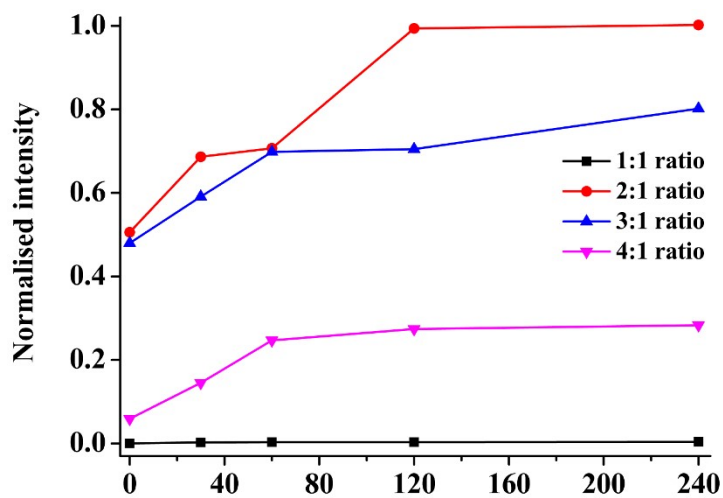

Figure S34. Intensity versus time curve of different ratios of *Hnaphurea.NO<sub>3</sub>* @CaO pellets in water ( $\lambda_{\text{ex}} = 258 \text{ nm}$ ,  $\lambda_{\text{em}} = 385 \text{ nm}$ ).

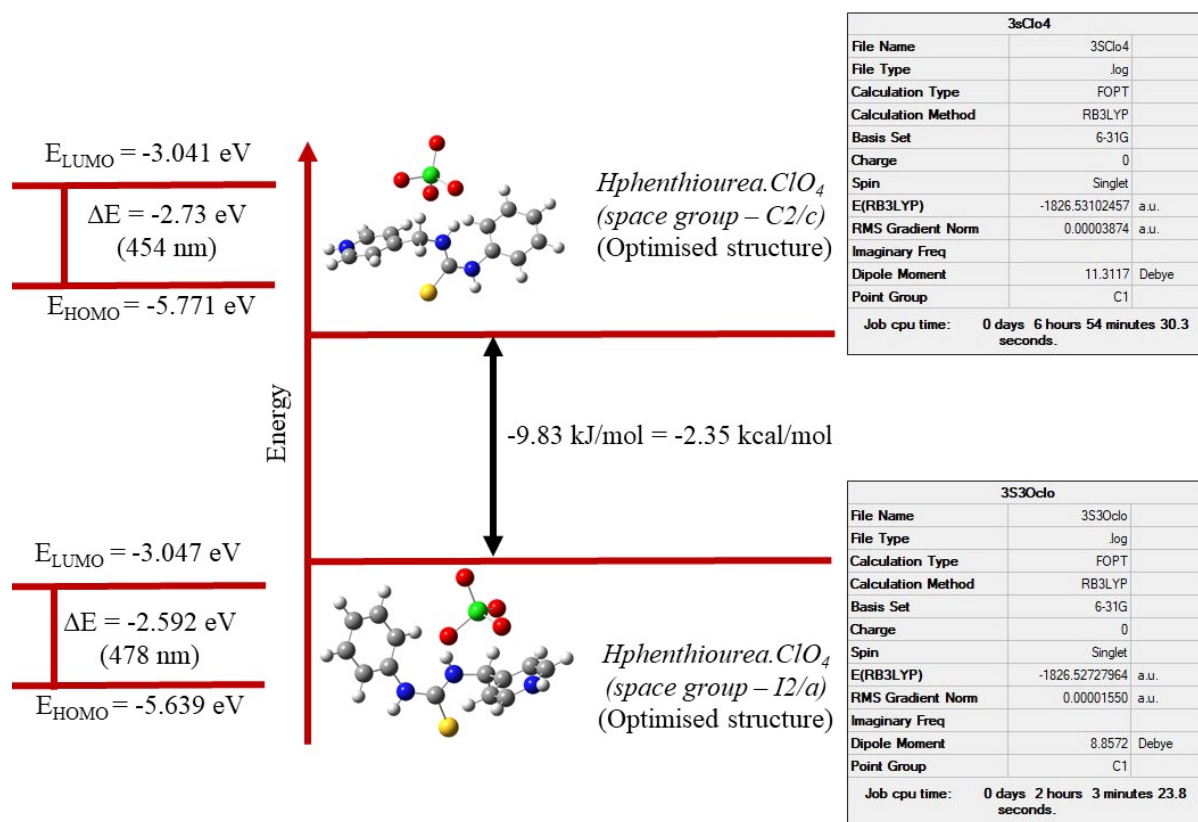

Figure S35. Electronic energy levels calculated by DFT showing the HOMO-LUMO gap in *Hphenthioourea.ClO<sub>4</sub>* with space groups C2/c and I2/a and total energy difference between these two forms (calculated by Gaussian software using the B3LYP functional and the 6-31G basis set).

Table S3. X, Y, Z coordinates of *Hphenthioourea.ClO<sub>4</sub>* (space group - C2/c).

| Center Number | Atomic Number | Coordinates (Å) |           |           |
|---------------|---------------|-----------------|-----------|-----------|
|               |               | X               | Y         | Z         |
| 1             | 17            | 0.059190        | -2.793878 | 0.201967  |
| 2             | 8             | 1.704025        | -2.629749 | 0.731428  |
| 3             | 8             | -0.945688       | -1.868863 | 1.297897  |
| 4             | 8             | -0.443323       | -4.427454 | 0.148811  |
| 5             | 8             | -0.065290       | -2.047936 | -1.378851 |
| 6             | 16            | 0.864983        | 3.255294  | 0.025398  |
| 7             | 7             | -1.587179       | 2.197330  | -0.333411 |
| 8             | 7             | -0.057201       | 0.809679  | 0.781390  |
| 9             | 6             | -2.750179       | 1.357218  | -0.300075 |
| 10            | 6             | -0.340552       | 1.984269  | 0.172929  |
| 11            | 6             | 2.406182        | 0.588431  | 0.500144  |



|    |   |           |           |           |
|----|---|-----------|-----------|-----------|
| 12 | 7 | 4.649394  | 0.387566  | -1.103620 |
| 13 | 6 | -2.710357 | 0.019479  | -0.717476 |
| 14 | 1 | -1.790375 | -0.433290 | -1.069846 |
| 15 | 6 | 1.221103  | 0.580421  | 1.440428  |
| 16 | 1 | 1.159845  | -0.420632 | 1.886377  |
| 17 | 1 | 1.382216  | 1.318498  | 2.232746  |
| 18 | 6 | 2.336841  | -0.046197 | -0.761577 |
| 19 | 1 | 1.412793  | -0.499994 | -1.106186 |
| 20 | 6 | -3.963672 | 1.932623  | 0.112950  |
| 21 | 1 | -3.982398 | 2.968218  | 0.439162  |
| 22 | 6 | -3.882531 | -0.744835 | -0.685799 |
| 23 | 1 | -3.838659 | -1.784476 | -0.990810 |
| 24 | 6 | 3.654421  | 1.089430  | 0.929223  |
| 25 | 1 | 3.743255  | 1.580380  | 1.889973  |
| 26 | 6 | -5.092893 | -0.177049 | -0.276102 |
| 27 | 1 | -5.998175 | -0.774839 | -0.261040 |
| 28 | 6 | -5.131922 | 1.167657  | 0.115299  |
| 29 | 1 | -6.066979 | 1.616944  | 0.434020  |
| 30 | 6 | 3.464642  | -0.130848 | -1.547757 |
| 31 | 1 | 3.473711  | -0.613533 | -2.515097 |
| 32 | 6 | 4.763181  | 0.987413  | 0.117317  |
| 33 | 1 | 5.739074  | 1.365590  | 0.388285  |
| 34 | 1 | -1.706070 | 3.124584  | -0.718881 |
| 35 | 1 | -0.721211 | 0.031850  | 0.843279  |
| 36 | 1 | 5.468520  | 0.313835  | -1.693620 |

Table S4. X, Y, Z coordinates of *Hphenthiourea.ClO<sub>4</sub>* (space group - I2/a).

| Center<br>Number | Atomic<br>Number | Coordinates (Angstroms) |           |           |
|------------------|------------------|-------------------------|-----------|-----------|
|                  |                  | X                       | Y         | Z         |
| 1                | 16               | -1.191556               | -3.839159 | -0.474492 |
| 2                | 7                | -2.650634               | -1.644204 | 0.067563  |
| 3                | 1                | -3.273922               | -2.384167 | 0.361282  |
| 4                | 7                | -0.472983               | -1.198569 | -0.649700 |
| 5                | 1                | -0.573322               | -0.202429 | -0.417704 |
| 6                | 7                | 4.033665                | -0.662776 | 1.441715  |
| 7                | 1                | 4.764571                | -0.341422 | 2.064335  |
| 8                | 6                | -4.272934               | 2.253624  | 0.401058  |
| 9                | 1                | -4.696346               | 3.247562  | 0.496801  |
| 10               | 6                | -4.518881               | 1.285029  | 1.381583  |
| 11               | 1                | -5.137886               | 1.522797  | 2.240593  |
| 12               | 6                | -3.955946               | 0.012165  | 1.269019  |
| 13               | 1                | -4.126709               | -0.734177 | 2.039247  |
| 14               | 6                | -3.153243               | -0.308125 | 0.161348  |
| 15               | 6                | -2.926571               | 0.653831  | -0.835878 |
| 16               | 1                | -2.340562               | 0.407761  | -1.713069 |
| 17               | 6                | -3.475038               | 1.932715  | -0.701748 |

|    |    |           |           |           |
|----|----|-----------|-----------|-----------|
| 18 | 1  | -3.278743 | 2.675907  | -1.466786 |
| 19 | 6  | -1.438570 | -2.107989 | -0.363216 |
| 20 | 6  | 0.819093  | -1.558281 | -1.211132 |
| 21 | 1  | 0.988501  | -0.984719 | -2.127300 |
| 22 | 1  | 0.778268  | -2.630464 | -1.457884 |
| 23 | 6  | 1.960887  | -1.292671 | -0.264748 |
| 24 | 6  | 1.784139  | -1.338484 | 1.132175  |
| 25 | 1  | 0.816723  | -1.584096 | 1.546549  |
| 26 | 6  | 2.828542  | -1.009366 | 1.970886  |
| 27 | 1  | 2.742920  | -0.989860 | 3.048002  |
| 28 | 6  | 4.249158  | -0.610658 | 0.100290  |
| 29 | 1  | 5.221669  | -0.273158 | -0.227585 |
| 30 | 6  | 3.228351  | -0.940607 | -0.767298 |
| 31 | 1  | 3.388084  | -0.846358 | -1.832356 |
| 32 | 17 | 1.445587  | 2.216612  | -0.302678 |
| 33 | 8  | 0.098523  | 1.374201  | 0.431453  |
| 34 | 8  | 2.833999  | 1.967445  | 0.705428  |
| 35 | 8  | 1.728859  | 1.472792  | -1.848780 |
| 36 | 8  | 1.097672  | 3.882149  | -0.471577 |

---
